# Supplementary material
Source: PubMed Central journal article supplement (PMC7614835)
Supplement: EMS181418-supplement-Supplementary_Material.pdf [file EMS181418-supplement-Supplementary_Material.pdf]

# Supporting Information

## Development of inhibitors of SAICAR synthetase (PurC) from *Mycobacterium abscessus* using a fragment-based approach.

Sitthivut Charoensutthivarakul<sup>a,e</sup>, Sherine E. Thomas<sup>b</sup>, Amy Curran<sup>a</sup>, Karen Brown<sup>c,d</sup>, Juan M. Belardinelli<sup>f</sup>, Andrew J. Whitehouse<sup>a</sup>, Marta Acebrón-García-de-Eulate<sup>b</sup>, Jaspar Sangan<sup>c,d</sup>, Subramanian G. Gramani<sup>a</sup>, Mary Jackson<sup>f</sup>, Vitor Mendes<sup>b</sup>, R. Andres Floto<sup>c,d</sup>, Tom L. Blundell<sup>\*b</sup>, Anthony G. Coyne<sup>\*a</sup> and Chris Abell<sup>a</sup>

- a) Yusuf Hamied Department of Chemistry, University of Cambridge, Lensfield Road, Cambridge, CB2 1EW, UK
- b) Department of Biochemistry, University of Cambridge, Tennis Court Road, Cambridge, CB2 1GA, UK.
- c) Molecular Immunity Unit, Department of Medicine, MRC Laboratory of Molecular Biology, University of Cambridge, Francis Crick Avenue, Cambridge Biomedical Campus, Cambridge, CB2 0QH, UK
- d) Cambridge Centre for Lung Infection, Royal Papworth Hospital, Cambridge, CB23 3RE, UK
- e) School of Bioinnovation and Bio-based Product Intelligence, Faculty of Science, Mahidol University, Bangkok, 10400, Thailand
- f) Mycobacteria Research Laboratories, Department of Microbiology, Immunology and Pathology, Colorado State University, Fort Collins, Colorado, 80523-1682, USA.

To whom correspondence may be addressed \*Anthony Coyne: [agc40@cam.ac.uk](mailto:agc40@cam.ac.uk), \* Tom Blundell: [tlb20@cam.ac.uk](mailto:tlb20@cam.ac.uk)

### Table of Contents

|                                                    | Page |
|----------------------------------------------------|------|
| 1. Synthetic Chemistry                             | S2   |
| 2. ITC                                             | S24  |
| 3. Sequence alignment <i>Mab</i> versus <i>Mtb</i> | S30  |
| 4. Hypoxanthine rescue experiment                  | S30  |
| 5. X-ray crystallography tables                    | S31  |
| 6. LCMS of screened compounds                      | S33  |

## Synthetic Chemistry

### General Procedures

Air and moisture-sensitive reactions were carried out in oven-dried glassware, sealed with rubber septa, under a positive pressure of dry nitrogen. Air and moisture-sensitive liquids and reagents were transferred via syringe. Reactions were stirred using Teflon-coated magnetic stir bars. The solvents such as dichloromethane (DCM), ethyl acetate, methanol and petroleum ether (PE) were distilled prior to use. Acetonitrile (ACN), dimethylsulphoxide (DMSO), 1,4-dioxane and tetrahydrofuran (THF) was purchased as anhydrous from commercial suppliers. All commercial reagents were used without further purifications.

Flash column chromatography was performed using automated Biotage Isolera purification systems with appropriately sized Biotage SNAP cartridges, containing KP 50  $\mu\text{m}$  silica. Microwave heating was performed using a Biotage Initiator+ system with sealed Biotage microwave reaction vials. Analytical thin layer chromatography (TLC) was performed using Merck glass-backed silica plates visualised with 254 or 365 nm ultraviolet light. High resolution mass spectrometry (HRMS) was performed using Waters Vion IMS QToF systems and the accuracy were within 5 ppm of calculated mass.

Nuclear magnetic resonance (NMR) spectra were recorded on 400 MHz Avance III HD or 500 MHz DCH Cryoprobe Bruker spectrometers.  $^1\text{H}$  NMR data are presented in the following order: chemical shift (in ppm on a  $\delta$  scale relative to the residual solvent resonance peak), multiplicity (s = singlet, d = doublet, t = triplet, q = quartet, m = multiplet), coupling constant (J, in Hz), and integration.  $^{13}\text{C}$  and  $^{19}\text{F}$  NMR spectra were proton-decoupled, with chemical shifts recorded, and further description are provided for certain peaks.  $^{11}\text{B}$  NMR spectra were also reported for boron containing compounds. All spectra were reported as observed, in some cases in the  $^{13}\text{C}$  NMR there is overlap with some peaks due to the splitting from the fluorine atom(s) on the phenyl ring.

A combination of TLC and LCMS analysis was used to monitor reaction progress.

All screened compounds possessed a purity of at least 95% as determined by LCMS analysis. The LCMS was carried out using a Waters Aquity UPLC system. The mobile phase was water (+1% formic acid) and acetonitrile. The samples were run over four minutes and a gradient elution was used as in the table below. Data collection started after 1 minute so the solvent peak is not observed. Peaks corresponding to the desired product are described, including the retention time (rt) and % purity by integration.

| Time (min/sec) | Flow rate ( mL/min) | Ratio Water: Acetonitrile |
|----------------|---------------------|---------------------------|
| 0              | 0.8                 | 95:5                      |
| 0.30           | 0.8                 | 95:5                      |
| 2.30           | 0.8                 | 5:95                      |
| 3.20           | 0.8                 | 95:5                      |
| 3.50           | 0.8                 | 95:5                      |

The column was maintained at a temperature of 40°C and the UV detection was at a wavelength of 254 nm. The column used was a C18+ Cortecs® UPLC column (1.6  $\mu\text{m}$ , 2.1 x 50 mm).

### General procedure A: Suzuki coupling reaction<sup>1</sup>

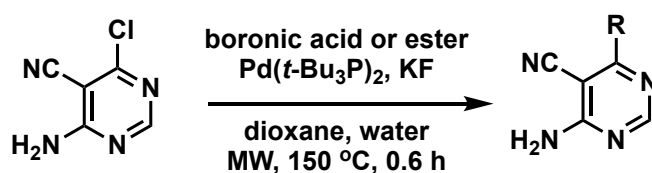

4-Amino-6-chloropyrimidine-5-carbonitrile (0.6 mmol, 1 eq), boronic acid or boronate pinacol ester (0.66 mmol, 1.1 eq), KF (1.8 mmol, 3 eq), and bis(tri-*tert*-butylphosphine)palladium(0) (0.012 mmol, 0.02 eq) were suspended in 1,4-dioxane (6 mL) and water (1 mL). The mixture was degassed and flushed with nitrogen for 10 min. The reaction mixture was then heated at 150 °C for 40 min in a sealed vial under microwave irradiation. After cooling to room temperature, the mixture was diluted with ethyl acetate and washed with water and brine. The organic phase was dried (MgSO<sub>4</sub>) and concentrated *in vacuo*. The residue was subjected to silica gel flash column chromatography (Biotage Isolera, 12 g silica column, using a mixture of EtOAc/PE or MeOH/EtOAc or MeOH/DCM) to afford the desired product.

### 4-Amino-6-(1-ethyl-1*H*-pyrazol-4-yl)pyrimidine-5-carbonitrile (**9**)

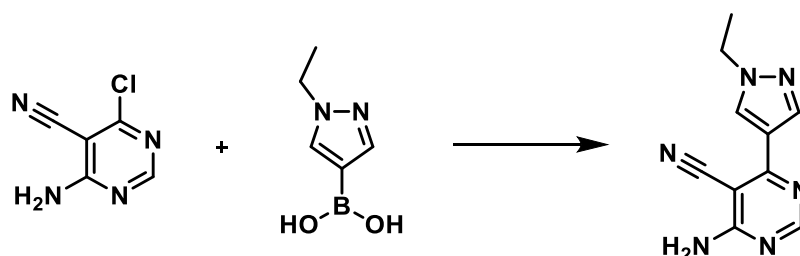

4-Amino-6-chloropyrimidine-5-carbonitrile **3** (93 mg) and ethyl pyrazole-4-boronic acid **32** (92 mg) were reacted following the General Procedure A to obtain compound **9** as a white solid (40-100% EtOAc/PE gradient) (89 mg, 69%).

<sup>1</sup>H NMR (400 MHz, DMSO-*d*<sub>6</sub>) δ 8.53 (s, 1H), 8.47 (s, 1H), 8.20 (s, 1H), 7.80 (s, 2H), 4.25 (q, *J* = 7.2 Hz, 2H), 1.41 (t, *J* = 7.2 Hz, 3H). <sup>13</sup>C NMR (101 MHz, DMSO-*d*<sub>6</sub>) δ 164.5, 160.6, 160.4, 139.3, 131.7, 119.3, 116.9, 82.8, 47.2, 15.8. LCMS (ESI<sup>+</sup>): *m/z* 215.2 [M+H]<sup>+</sup>, (ESI<sup>-</sup>): *m/z* 213.1 [M-H]<sup>-</sup>, *rt* 1.28 minutes, >99%. HRMS (ESI): *m/z* calculated for C<sub>10</sub>H<sub>11</sub>N<sub>6</sub> [M+H]<sup>+</sup> requires 215.1039, found 215.1042. *R*<sub>f</sub>: 0.29 (100% EtOAc).

### 4-Amino-6-(pyridin-3-yl)pyrimidine-5-carbonitrile (**10**)

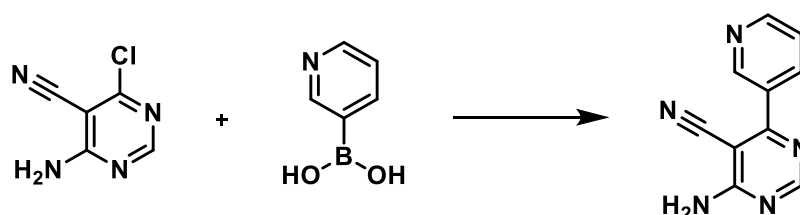

4-Amino-6-chloropyrimidine-5-carbonitrile (93 mg) and pyridine-3-boronic acid **33** (82 mg) were reacted following the General Procedure A to obtain compound **10** as a yellow solid (40-100% EtOAc/PE gradient)(30 mg, 25%).

<sup>1</sup>H NMR (400 MHz, DMSO-*d*<sub>6</sub>) δ 9.02 (d, *J* = 1.5 Hz, 1H), 8.76 (d, *J* = 3.7 Hz, 1H), 8.65 (s, 1H), 8.25 (d, *J* = 7.8 Hz, 1H), 8.22 – 7.72 (br m, 2H), 7.60 (dd, *J* = 7.8, 4.9 Hz, 1H). <sup>13</sup>C NMR (101 MHz, DMSO-*d*<sub>6</sub>) δ 165.9, 164.3, 160.4, 151.9, 149.4, 136.6, 132.6, 123.9, 115.9, 87.3. LCMS (ESI<sup>+</sup>): *m/z* 198.2 [M+H]<sup>+</sup>, (ESI<sup>-</sup>): *m/z* 196.2 [M-H]<sup>-</sup>, *rt* 1.16 minutes, >99%. HRMS (ESI): *m/z* calculated for C<sub>10</sub>H<sub>8</sub>N<sub>5</sub> [M+H]<sup>+</sup> requires 198.0774, found 198.0779. *R*<sub>f</sub>: 0.27 (100% EtOAc)

#### 4-Amino-6-(6-methoxypyridin-3-yl)pyrimidine-5-carbonitrile (11)

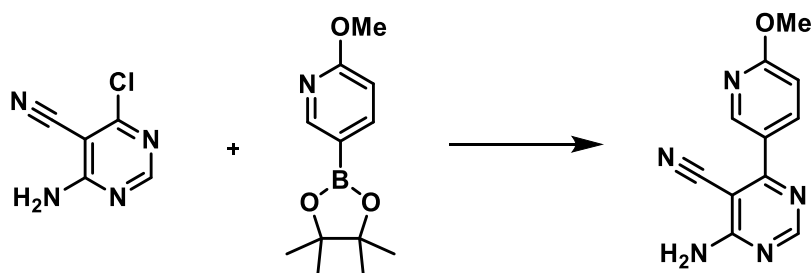

4-Amino-6-chloropyrimidine-5-carbonitrile (93 mg) and 2-methoxypyridine-5-boronic acid pinacol ester **34** (155 mg) were reacted following the General Procedure A to obtain compound **11** as a white solid (40-70% EtOAc/PE gradient)(37 mg, 27%).

$^1\text{H}$  NMR (400 MHz, DMSO- $d_6$ )  $\delta$  8.73 (d,  $J$  = 2.4 Hz, 1H), 8.60 (s, 1H), 8.20 (dd,  $J$  = 8.7, 2.4 Hz, 1H), 8.17 – 7.59 (br m, 2H), 7.00 (d,  $J$  = 8.7 Hz, 1H), 3.95 (s, 3H).  $^{13}\text{C}$  NMR (101 MHz, DMSO- $d_6$ )  $\delta$  165.5, 164.5, 160.3, 147.9, 139.7, 126.2, 116.3, 110.9, 86.3, 54.2. LCMS (ESI $^+$ ):  $m/z$  228.2 [M+H] $^+$ , (ESI $^-$ ):  $m/z$  226.1 [M-H] $^-$ , rt 1.34 minutes, >99%. HRMS (ESI):  $m/z$  calculated for  $\text{C}_{11}\text{H}_{10}\text{N}_5\text{O}$  [M+H] $^+$  requires 228.0880, found 228.0881. R $_f$ : 0.24 (50% EtOAc/hexanes).

#### 4-Amino-6-(1-(morpholine-4-carbonyl)-1H-pyrazol-4-yl)pyrimidine-5-carbonitrile (12)

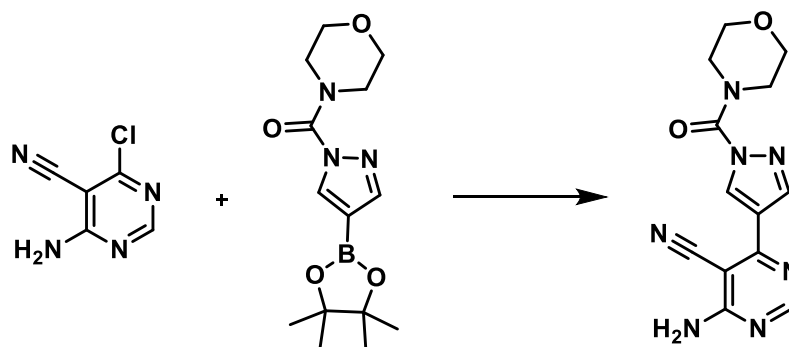

4-Amino-6-chloropyrimidine-5-carbonitrile **3** (31 mg, 0.2 mmol) and **37** (61 mg, 0.22 mmol) were reacted following the General Procedure A to obtain compound **12** as a white solid (50-100% EtOAc/PE gradient) (22 mg, 37%).

$^1\text{H}$  NMR (400 MHz, DMSO- $d_6$ )  $\delta$  8.90 (s, 1H), 8.55 (s, 1H), 8.40 (s, 1H), 7.96 (br s, 2H), 3.79 – 3.63 (m, 8H).  $^{13}\text{C}$  NMR (101 MHz, DMSO- $d_6$ )  $\delta$  164.3, 160.6, 159.5, 150.2, 141.6, 133.4, 120.8, 116.5, 84.2, 66.3, 46.9. LCMS (ESI $^+$ ):  $m/z$  300.3 [M+H] $^+$ , (ESI $^-$ ):  $m/z$  298.1 [M-H] $^-$ , rt 1.36 minutes, >99%. HRMS (ESI):  $m/z$  calculated for  $\text{C}_{13}\text{H}_{14}\text{N}_7\text{O}_2$  [M+H] $^+$  requires 300.1204, found 300.1208. R $_f$ : 0.32 (100% EtOAc).

#### 4-Amino-6-(1-(2-morpholinoethyl)-1H-pyrazol-4-yl)pyrimidine-5-carbonitrile (13)

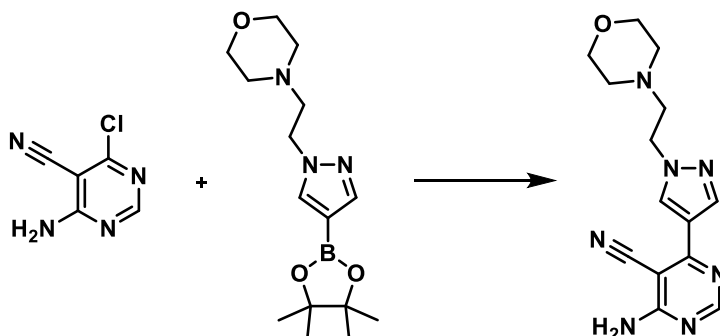



4-Amino-6-chloropyrimidine-5-carbonitrile **3** (93 mg) and 1-(2-morpholinoethyl)-1H-pyrazole-4-boronic acid pinacol ester **38a** (0.203 g) were reacted following the General Procedure A to obtain compound **13** as a white solid (2-10% MeOH/DCM gradient) (58 mg, 32%).

$^1\text{H}$  NMR (400 MHz, DMSO- $d_6$ )  $\delta$  8.62 (s, 1H), 8.47 (s, 1H), 8.18 (s, 1H), 7.79 (br s, 2H), 4.34 (t,  $J$  = 6.2 Hz, 2H), 3.56 (t,  $J$  = 4.3, 4H), 2.73 (t,  $J$  = 6.2 Hz, 2H), 2.43 (s, 4H).  $^{13}\text{C}$  NMR (101 MHz, DMSO- $d_6$ )  $\delta$  164.5, 160.6, 160.4, 139.3, 132.8, 119.2, 116.8, 82.8, 66.6, 57.8, 53.5, 49.3. LCMS (ESI $^+$ ):  $m/z$  300.3 [M+H] $^+$ , (ESI $^-$ ):  $m/z$  298.2 [M-H] $^-$ , rt 0.56 minutes, >99%. HRMS (ESI):  $m/z$  calculated for  $\text{C}_{14}\text{H}_{18}\text{N}_7\text{O}$  [M+H] $^+$  requires 300.1568, found 300.1566. Rf: 0.32 (10% MeOH/DCM).

#### Ethyl 2-(4-(6-amino-5-cyanopyrimidin-4-yl)-1H-pyrazol-1-yl)acetate (**14**)

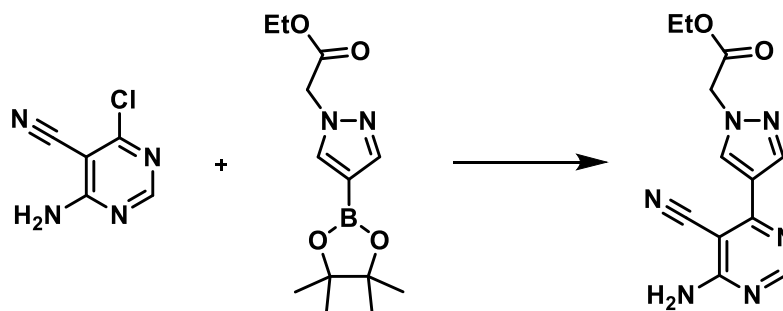

4-Amino-6-chloropyrimidine-5-carbonitrile **3** (93 mg) and 1-(ethoxycarbonyl)methyl-1H-pyrazole-4-boronic acid pinacol ester **38b** (185 mg) were reacted following the General Procedure A to obtain compound **14** as a white solid (50-100% EtOAc/PE gradient) (62 mg, 38%).

$^1\text{H}$  NMR (400 MHz, DMSO- $d_6$ )  $\delta$  8.61 (s, 1H), 8.49 (s, 1H), 8.23 (s, 1H), 7.84 (br s, 2H), 5.22 (s, 2H), 4.18 (q,  $J$  = 7.1 Hz, 2H), 1.23 (t,  $J$  = 7.1 Hz, 3H).  $^{13}\text{C}$  NMR (101 MHz, DMSO- $d_6$ )  $\delta$  168.3, 164.5, 160.5, 160.4, 139.9, 133.9, 119.9, 116.7, 83.1, 79.6, 61.7, 53.3, 14.5. LCMS (ESI $^+$ ):  $m/z$  295.2 [M+Na] $^+$ , (ESI $^-$ ):  $m/z$  271.2 [M-H] $^-$ , rt 0.54 minutes, >99%. HRMS (ESI):  $m/z$  calculated for  $\text{C}_{12}\text{H}_{13}\text{N}_6\text{O}_2$  [M+H] $^+$  requires 273.1095, found 273.1097. Rf: 0.47 (100% EtOAc).

#### 4-Amino-6-(1-(2-morpholino-2-oxoethyl)-1H-pyrazol-4-yl)pyrimidine-5-carbonitrile (**15**)

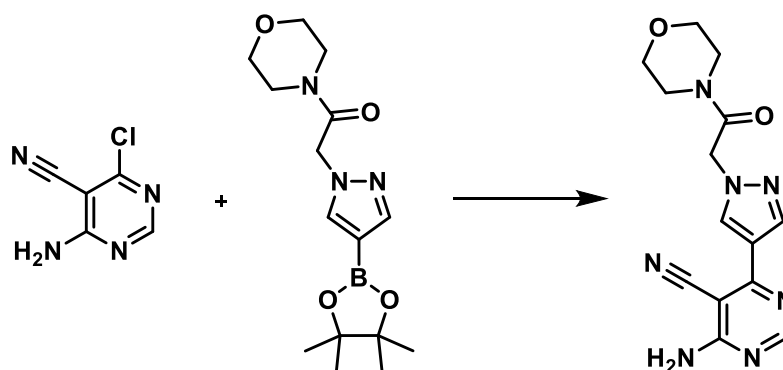

4-Amino-6-chloropyrimidine-5-carbonitrile **3** (93 mg) and **38c** (330 mg) were reacted following the General Procedure A to obtain compound **15** as a white solid (0-10 % MeOH/EtOAc gradient) (39 mg, 19%).

$^1\text{H}$  NMR (400 MHz, DMSO- $d_6$ )  $\delta$  8.50 (s, 1H), 8.49 (s, 1H), 8.19 (s, 1H), 7.82 (br s, 2H), 5.31 (s, 2H), 3.68 – 3.56 (m, 4H), 3.55 – 3.42 (m, 4H).  $^{13}\text{C}$  NMR (101 MHz, DMSO- $d_6$ )  $\delta$  165.6, 164.5, 160.5, 160.5, 139.4, 134.0, 119.6, 116.8, 82.8, 66.4, 66.3, 53.5, 45.2, 42.4. LCMS (ESI $^+$ ):  $m/z$  336.2 [M+Na] $^+$ , (ESI $^-$ ):  $m/z$  312.2 [M-H] $^-$ , rt 0.53 minutes, >99%. HRMS (ESI):  $m/z$  calculated for  $\text{C}_{14}\text{H}_{15}\text{N}_7\text{O}_2\text{Na}$  [M+Na] $^+$  requires 336.1179, found 336.1170. Rf: 0.10 (100% EtOAc).

#### 4-Amino-6-(1-(pyridin-3-ylmethyl)-1H-pyrazol-4-yl)pyrimidine-5-carbonitrile (16)

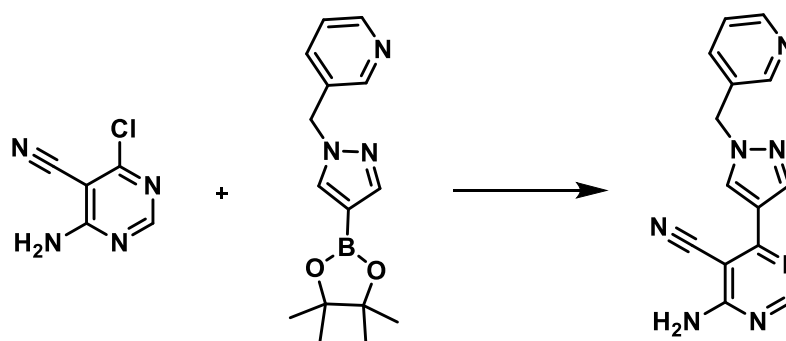

4-Amino-6-chloropyrimidine-5-carbonitrile **3** (93 mg) and 1-(3-pyridylmethyl)-1H-pyrazole-4-boronic acid pinacol ester **51** (188 mg) were reacted following the General Procedure A to obtain compound **16** as a white solid (0-10 % MeOH/EtOAc gradient) (115 mg, 69%).

$^1\text{H}$  NMR (400 MHz, DMSO- $d_6$ )  $\delta$  8.73 (s, 1H), 8.59 (d,  $J = 1.2$  Hz, 1H), 8.56 – 8.51 (m, 1H), 8.48 (s, 1H), 8.23 (s, 1H), 7.82 (br s, 2H), 7.73 (d,  $J = 7.7$  Hz, 1H), 7.40 (dd,  $J = 7.7, 4.8$  Hz, 1H), 5.52 (s, 2H).  $^{13}\text{C}$  NMR (101 MHz, DMSO- $d_6$ )  $\delta$  164.5, 160.4, 160.4, 149.6, 149.6, 140.1, 136.2, 132.8, 132.7, 124.2, 119.8, 116.7, 83.1, 53.0. LCMS (ESI $^+$ ):  $m/z$  278.2 [M+H] $^+$ , rt 1.04 minutes, 96%. HRMS (ESI):  $m/z$  calculated for  $\text{C}_{14}\text{H}_{12}\text{N}_7$  [M+H] $^+$  requires 278.1148, found 278.1153. R $_f$ : 0.28 (10% MeOH/DCM).

#### 4-Amino-6-(1-(pyridin-4-ylmethyl)-1H-pyrazol-4-yl)pyrimidine-5-carbonitrile (17)

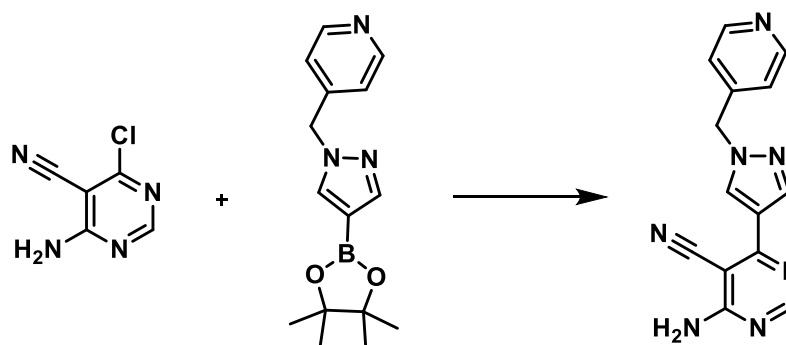

4-Amino-6-chloropyrimidine-5-carbonitrile **3** (93 mg) and **52** (188 mg) were reacted following the General Procedure A to obtain compound **17** as an off-white solid (0-10 % MeOH/EtOAc gradient) (121 mg, 73%).

$^1\text{H}$  NMR (400 MHz, DMSO- $d_6$ )  $\delta$  8.75 (s, 1H), 8.55 (d,  $J = 5.9$  Hz, 2H), 8.49 (s, 1H), 8.27 (s, 1H), 7.83 (br s, 2H), 7.20 (d,  $J = 5.9$  Hz, 2H), 5.55 (s, 2H).  $^{13}\text{C}$  NMR (100 MHz, DMSO- $d_6$ )  $\delta$  164.5, 160.5, 160.3, 150.4, 146.2, 140.3, 133.3, 122.7, 119.9, 116.8, 83.1, 54.3. LCMS (ESI $^+$ ):  $m/z$  278.2 [M+H] $^+$ , (ESI $^-$ ):  $m/z$  276.1 [M-H] $^-$ , rt 0.67 minutes, 97%. HRMS (ESI):  $m/z$  calculated for  $\text{C}_{14}\text{H}_{12}\text{N}_7$  [M+H] $^+$  requires 278.1148, found 278.1149. R $_f$ : 0.30 (10% MeOH/EtOAc).

#### 4-Amino-6-(1-((5-methoxypyridin-3-yl)methyl)-1H-pyrazol-4-yl)pyrimidine-5-carbonitrile (18)

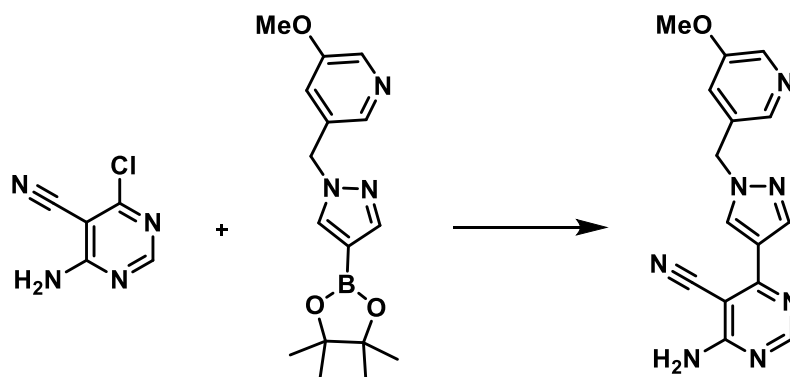

4-Amino-6-chloropyrimidine-5-carbonitrile **3** (63 mg, 0.4 mmol) and **53** (142 mg, 0.44 mmol) were reacted following the General Procedure A to obtain the product as an off-white solid (0-10 % MeOH/EtOAc gradient) (46 mg, 37%).

$^1\text{H}$  NMR (400 MHz, DMSO- $d_6$ )  $\delta$  8.73 (s, 1H), 8.48 (s, 1H), 8.26 (d,  $J$  = 2.7 Hz, 1H), 8.23 (s, 1H), 8.17 (d,  $J$  = 1.2 Hz, 1H), 7.82 (br s, 2H), 7.39 – 7.34 (m, 1H), 5.50 (s, 2H), 3.82 (s, 3H).  $^{13}\text{C}$  NMR (100 MHz, DMSO- $d_6$ )  $\delta$  164.5, 160.4, 155.7, 141.7, 140.1, 137.4, 133.5, 132.7, 120.6, 119.8, 116.8, 83.1, 56.1, 52.9. LCMS (ESI+):  $m/z$  308.2  $[\text{M}+\text{H}]^+$ , (ESI-):  $m/z$  306.1  $[\text{M}-\text{H}]^-$ , rt 1.25 minutes, >99%. HRMS (ESI):  $m/z$  calculated for  $\text{C}_{15}\text{H}_{14}\text{N}_7\text{O}$   $[\text{M}+\text{H}]^+$  requires 308.1254, found 308.1251. R<sub>f</sub>: 0.29 (100% EtOAc).

#### 4-Amino-6-(1-(3-fluorobenzyl)-1H-pyrazol-4-yl)pyrimidine-5-carbonitrile (19)

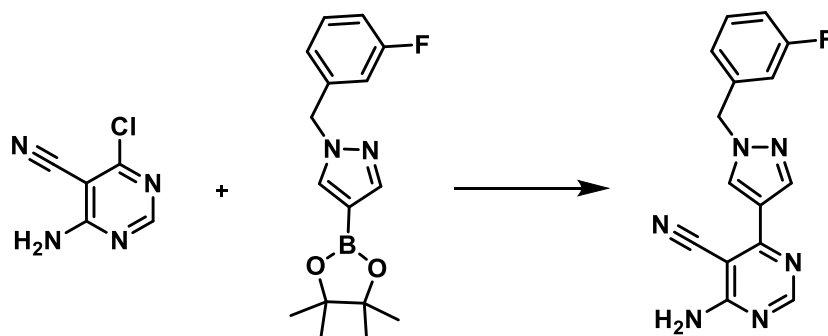

4-Amino-6-chloropyrimidine-5-carbonitrile **3** (93 mg) and **54** (199 mg) were reacted following the General Procedure A to obtain compound **19** as a white solid (40-100 % EtOAc/PE gradient) (71 mg, 40%).

$^1\text{H}$  NMR (400 MHz, MeOD)  $\delta$  8.58 (s, 1H), 8.46 (s, 1H), 8.35 (d,  $J$  = 0.6 Hz, 1H), 7.41 (td,  $J$  = 7.9, 6.0 Hz, 1H), 7.17 – 7.12 (m, 1H), 7.11 – 7.03 (m, 2H), 5.47 (s, 2H).  $^{13}\text{C}$  NMR (100 MHz, DMSO- $d_6$ )  $\delta$  164.5, 162.5 (d,  $J$  = 244 Hz), 160.4, 140.1, 139.9 (d,  $J$  = 7.5 Hz), 132.8, 131.1 (d,  $J$  = 8.3 Hz), 124.3 (d,  $J$  = 2.7 Hz), 119.8, 116.8, 115.2 (d,  $J$  = 21.0 Hz), 115.1 (d,  $J$  = 21.8 Hz), 83.1, 54.9.  $^{19}\text{F}$  NMR (376 MHz, MeOD)  $\delta$  -114.5. LCMS (ESI+):  $m/z$  295.2  $[\text{M}+\text{H}]^+$ , (ESI-):  $m/z$  293.1  $[\text{M}-\text{H}]^-$ , rt 1.66 minutes, >99%. HRMS (ESI):  $m/z$  calculated for  $\text{C}_{15}\text{H}_{12}\text{FN}_6$   $[\text{M}+\text{H}]^+$  requires 295.1102, found 295.1101. R<sub>f</sub>: 0.62 (100% EtOAc).

#### 4-Amino-6-(1-(3-(trifluoromethyl)benzyl)-1H-pyrazol-4-yl)pyrimidine-5-carbonitrile (20)

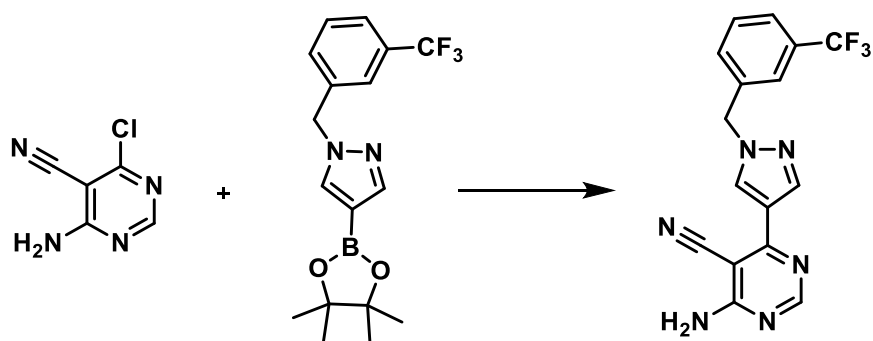

4-Amino-6-chloropyrimidine-5-carbonitrile **3** (93 mg) and **55** (0.232 g) were reacted following the General Procedure A to obtain the product **20** as an off-white solid (50-100 % EtOAc/PE gradient) (0.168 g, 81%).

$^1\text{H}$  NMR (400 MHz, MeOD)  $\delta$  8.62 (s, 1H), 8.46 (s, 1H), 8.37 (s, 1H), 7.71 – 7.62 (m, 2H), 7.61 – 7.55 (m, 2H), 5.56 (s, 2H).  $^{13}\text{C}$  NMR (100 MHz, DMSO- $d_6$ )  $\delta$  164.0, 160.0, 159.9, 139.7, 138.2, 132.5, 132.0, 129.8, 128.7-128.1 (m), 124.6 (dq,  $J$  = 15.5, 4.0 Hz), 124.1 (q,  $J$  = 273 Hz), 119.4, 116.3, 82.6, 54.3.  $^{19}\text{F}$  NMR (376 MHz, MeOD)  $\delta$  -64.2. LCMS (ESI $^+$ ):  $m/z$  345.2 [M+H] $^+$ , (ESI $^-$ ):  $m/z$  343.1 [M-H] $^-$ , rt 1.84 minutes, >99%. HRMS (ESI):  $m/z$  calculated for C<sub>16</sub>H<sub>12</sub>F<sub>3</sub>N<sub>6</sub> [M+H] $^+$  requires 345.1070, found 345.1058. R<sub>f</sub>: 0.59 (100% EtOAc).

#### 4-Amino-6-(1-(3-fluoro-5-methoxybenzyl)-1H-pyrazol-4-yl)pyrimidine-5-carbonitrile (21)

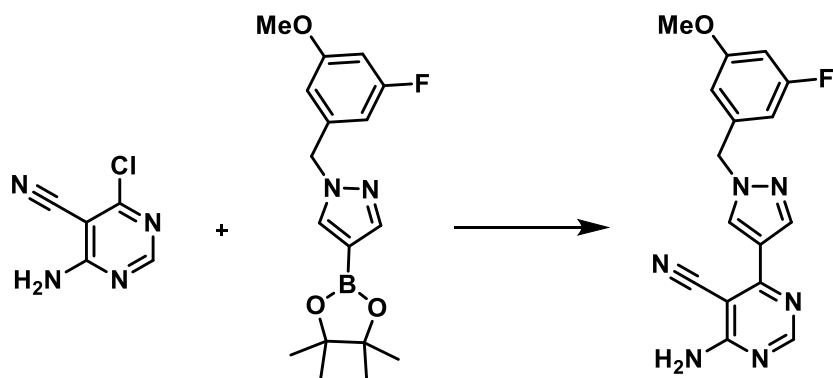

4-Amino-6-chloropyrimidine-5-carbonitrile **3** (93 mg) and **56** (0.219 g) were reacted following the General Procedure A to obtain the product **21** as an off-white solid (50-100 % EtOAc/PE gradient) (0.133 g, 68%).

$^1\text{H}$  NMR (400 MHz, DMSO- $d_6$ )  $\delta$  8.69 (s, 1H), 8.48 (s, 1H), 8.23 (s, 1H), 7.83 (s, 2H), 6.79 (dt,  $J$  = 11.0, 2.3 Hz, 1H), 6.74 (s, 1H), 6.69 (dd,  $J$  = 9.2, 1.4 Hz, 1H), 5.43 (s, 2H), 3.75 (s, 3H).  $^{13}\text{C}$  NMR (100 MHz, DMSO- $d_6$ )  $\delta$  164.5, 163.4 (d,  $J$  = 243 Hz), 161.3 (d,  $J$  = 11.6 Hz), 160.4, 140.4 (d,  $J$  = 9.7 Hz), 140.0, 132.8, 119.8, 116.8, 110.6 (d,  $J$  = 2.6 Hz), 106.9 (d,  $J$  = 22.5 Hz), 101.2 (d,  $J$  = 25.1 Hz), 83.1, 56.1, 54.9.  $^{19}\text{F}$  NMR (376 MHz, DMSO)  $\delta$  -111.3. LCMS (ESI $^+$ ):  $m/z$  325.2 [M+H] $^+$ , (ESI $^-$ ):  $m/z$  323.1 [M-H] $^-$ , rt 1.71 minutes, >99%. HRMS (ESI):  $m/z$  calculated for C<sub>16</sub>H<sub>14</sub>FON<sub>6</sub> [M+H] $^+$  requires 325.1208, found 325.1204. R<sub>f</sub>: 0.54 (100% EtOAc).

#### 4-Amino-6-(1-(4-fluorobenzyl)-1H-pyrazol-4-yl)pyrimidine-5-carbonitrile (**22**)

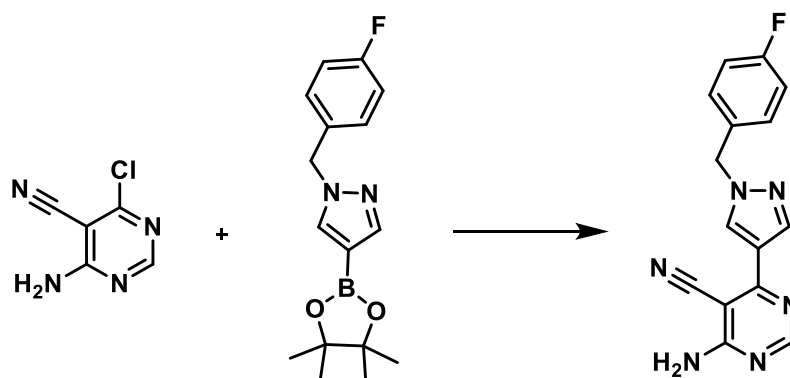

4-Amino-6-chloropyrimidine-5-carbonitrile **3** (93 mg) and **57** (0.199 g) were reacted following the General Procedure A to obtain the product **22** as an off-white solid (50-100 % EtOAc/PE gradient) (70 mg, 40%).

$^1\text{H}$  NMR (400 MHz, DMSO- $d_6$ )  $\delta$  8.67 (s, 1H), 8.47 (s, 1H), 8.22 (s, 1H), 7.82 (br s, 2H), 7.43 – 7.34 (m, 2H), 7.20 (app t,  $J$  = 8.8 Hz, 2H), 5.45 (s, 2H).  $^{13}\text{C}$  NMR (100 MHz, DMSO- $d_6$ )  $\delta$  164.5, 162.2 (d,  $J$  = 243 Hz), 160.4, 139.9, 133.4 (d,  $J$  = 3.0 Hz), 132.5, 130.6 (d,  $J$  = 8.3 Hz), 119.7, 118.7, 116.8, 115.9 (d,  $J$  = 21.5 Hz), 83.0, 54.7.  $^{19}\text{F}$  NMR (376 MHz, DMSO- $d_6$ )  $\delta$  -114.5. LCMS (ESI+):  $m/z$  295.2  $[\text{M}+\text{H}]^+$ , (ESI $^-$ ):  $m/z$  293.1  $[\text{M}-\text{H}]^-$ ,  $r_t$  1.65 minutes, >99%. HRMS (ESI):  $m/z$  calculated for  $\text{C}_{15}\text{H}_{12}\text{FN}_6$   $[\text{M}+\text{H}]^+$  requires 295.1102, found 295.1105.  $R_f$ : 0.56 (100% EtOAc).

#### 4-Amino-6-(1-benzyl-1H-pyrazol-4-yl)pyrimidine-5-carbonitrile (**23**)

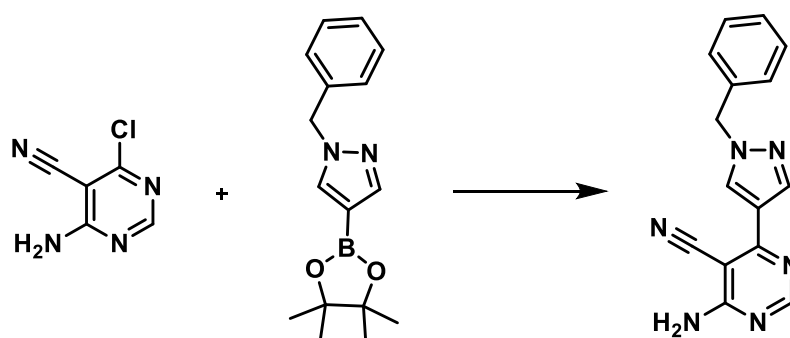

4-Amino-6-chloropyrimidine-5-carbonitrile **3** (93 mg) and **58** (0.188 g) were reacted following the General Procedure A to obtain the product **23** as a white solid (50-90 % EtOAc/PE gradient) (47 mg, 28%).

$^1\text{H}$  NMR (400 MHz, DMSO- $d_6$ )  $\delta$  8.66 (s, 1H), 8.47 (s, 1H), 8.23 (s, 1H), 7.81 (br s, 2H), 7.43 – 7.25 (m, 5H), 5.46 (s, 2H).  $^{13}\text{C}$  NMR (100 MHz, DMSO- $d_6$ )  $\delta$  164.5, 160.5, 160.4, 139.9, 137.2, 132.6, 129.1, 128.3, 128.3, 119.7, 118.6, 116.8, 82.9, 55.6. LCMS (ESI+):  $m/z$  277.2  $[\text{M}+\text{H}]^+$ , (ESI $^-$ ):  $m/z$  275.1  $[\text{M}-\text{H}]^-$ ,  $r_t$  1.62 minutes, >99%. HRMS (ESI):  $m/z$  calculated for  $\text{C}_{15}\text{H}_{13}\text{N}_6$   $[\text{M}+\text{H}]^+$  requires 277.1196, found 277.1193.  $R_f$ : 0.55 (100% EtOAc).

#### 4-Amino-6-(1-(1-phenylethyl)-1H-pyrazol-4-yl)pyrimidine-5-carbonitrile (**24**)

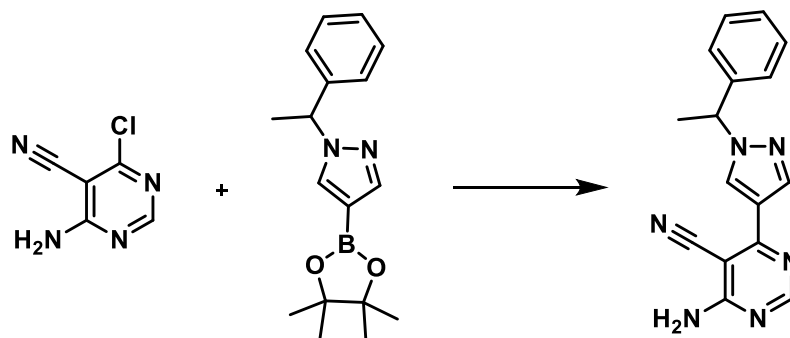

4-Amino-6-chloropyrimidine-5-carbonitrile **3** (47 mg, 0.3 mmol) and **59** (98 mg, 0.33 mmol) were reacted following the General Procedure A to obtain the product **24** as a white solid (50-100 % EtOAc/PE gradient) (28 mg, 33%).

$^1\text{H}$  NMR (400 MHz, DMSO- $d_6$ )  $\delta$  8.61 (s, 1H), 8.47 (s, 1H), 8.24 (s, 1H), 7.80 (br s, 2H), 7.40 – 7.25 (m, 5H), 5.78 (q,  $J$  = 7.0 Hz, 1H), 1.85 (d,  $J$  = 7.0 Hz, 3H).  $^{13}\text{C}$  NMR (101 MHz, DMSO- $d_6$ )  $\delta$  164.5, 160.5, 160.4, 142.0, 139.4, 131.2, 129.0, 128.2, 126.9, 119.4, 116.8, 82.9, 60.9, 21.3. LCMS (ESI $^+$ ):  $m/z$  291.2 [M+H] $^+$ , (ESI $^-$ ):  $m/z$  289.1 [M-H] $^-$ , rt 1.71 minutes, >99%. HRMS (ESI):  $m/z$  calculated for  $\text{C}_{16}\text{H}_{15}\text{N}_6$  [M+H] $^+$  requires 291.1353, found 291.1349. R $_f$ : 0.52 (100% EtOAc).

#### 4-Amino-6-(1-phenethyl-1H-pyrazol-4-yl)pyrimidine-5-carbonitrile (**25**)

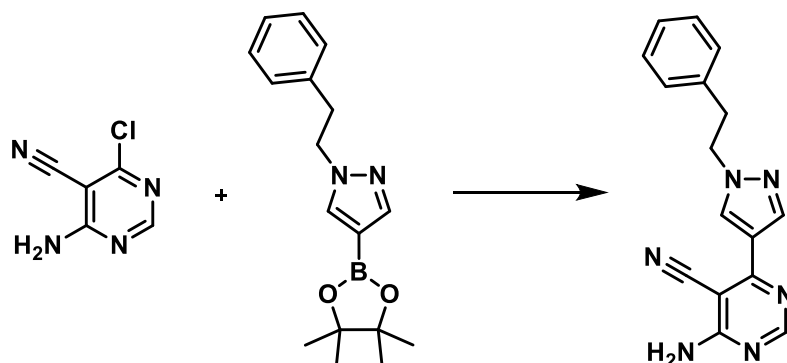

4-Amino-6-chloropyrimidine-5-carbonitrile **3** (47 mg, 0.3 mmol) and **60** (98 mg, 0.33 mmol) were reacted following the General Procedure A to obtain the product **25** as a white solid (50-100% EtOAc/PE gradient) (32 mg, 37%).

$^1\text{H}$  NMR (400 MHz, DMSO- $d_6$ )  $\delta$  8.45 (s, 1H), 8.43 (s, 1H), 8.22 (s, 1H), 7.79 (br s, 2H), 7.33 – 7.24 (m, 2H), 7.24 – 7.16 (m, 3H), 4.47 (t,  $J$  = 7.3 Hz, 2H), 3.15 (t,  $J$  = 7.3 Hz, 2H).  $^{13}\text{C}$  NMR (100 MHz, DMSO- $d_6$ )  $\delta$  164.5, 160.5, 160.4, 139.5, 138.4, 132.4, 129.1, 128.8, 126.9, 119.1, 116.8, 82.8, 53.2, 36.2. LCMS (ESI $^+$ ):  $m/z$  291.2 [M+H] $^+$ , (ESI $^-$ ):  $m/z$  289.2 [M-H] $^-$ , rt 1.71 minutes, >99%. HRMS (ESI):  $m/z$  calculated for  $\text{C}_{16}\text{H}_{15}\text{N}_6$  [M+H] $^+$  requires 291.1353, found 291.1350. R $_f$ : 0.53 (100% EtOAc).

#### 4-Amino-6-(1-(3,5-difluorobenzyl)-1H-pyrazol-4-yl)pyrimidine-5-carbonitrile (26)

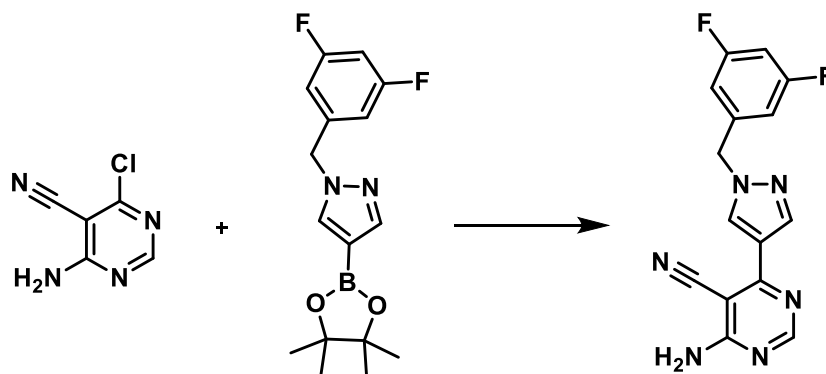

4-Amino-6-chloropyrimidine-5-carbonitrile **3** (93 mg) and **61** (0.211 g) were reacted following the General Procedure A to obtain the product **26** as an off-white solid (50-90 % EtOAc/PE gradient) (75 mg, 40%).

<sup>1</sup>H NMR (400 MHz, DMSO-*d*<sub>6</sub>) δ 8.73 (s, 1H), 8.49 (s, 1H), 8.25 (s, 1H), 7.84 (br s, 2H), 7.21 (tt, *J* = 9.4, 2.2 Hz, 1H), 7.03 (d, *J* = 6.4 Hz, 2H), 5.50 (s, 2H). <sup>13</sup>C NMR (100 MHz, DMSO-*d*<sub>6</sub>) δ 164.5, 162.8 (d, *J* = 247 Hz), 162.7 (d, *J* = 247 Hz), 160.5, 160.4, 141.6 (t, *J* = 9.3 Hz), 140.3, 133.0, 119.9, 116.7, 111.4 (m), 103.9 (app t, *J* = 25.6 Hz), 83.2, 54.5. <sup>19</sup>F NMR (376 MHz, DMSO-*d*<sub>6</sub>) δ -109.4. LCMS (ESI+): *m/z* 313.2 [M+H]<sup>+</sup>, (ESI-): *m/z* 311.0 [M-H]<sup>-</sup>, rt 1.73 minutes, >99%. HRMS (ESI): *m/z* calculated for C<sub>15</sub>H<sub>11</sub>N<sub>6</sub>F<sub>2</sub> [M+H]<sup>+</sup> requires 313.1008, found 313.1003. Rf: 0.34 (100% EtOAc).

#### 4-Amino-6-(1-(3,4-difluorobenzyl)-1H-pyrazol-4-yl)pyrimidine-5-carbonitrile (27)

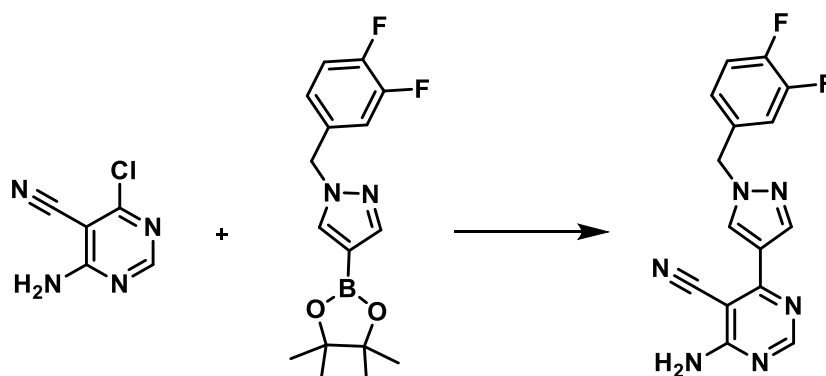

4-Amino-6-chloropyrimidine-5-carbonitrile **3** (93 mg) and **62** (0.211 g) were reacted following the General Procedure A to obtain the product **27** as an off-white solid (50-90 % EtOAc/PE gradient) (93 mg, 50%).

<sup>1</sup>H NMR (400 MHz, DMSO-*d*<sub>6</sub>) δ 8.70 (s, 1H), 8.48 (s, 1H), 8.23 (s, 1H), 7.84 (br s, 2H), 7.50 – 7.38 (m, 2H), 7.21 – 7.14 (m, 1H), 5.46 (s, 2H). <sup>13</sup>C NMR (100 MHz, DMSO-*d*<sub>6</sub>) δ 164.1, 160.1, 160.0, 149.3, dd, *J* = 246, 12.9 Hz), 149.2 (dd, *J* = 245, 12.1 Hz), 139.8, 134.5 (dd, *J* = 5.9, 3.8 Hz), 132.4, 125.1 (dd, *J* = 6.8, 3.4 Hz), 119.4, 118.2 (d, *J* = 17.3 Hz), 117.6 (d, *J* = 17.5 Hz), 116.4, 82.7, 53.9. <sup>19</sup>F NMR (376 MHz, DMSO-*d*<sub>6</sub>) δ -138.3 (d, *J* = 22.3 Hz), -139.8 (d, *J* = 22.3 Hz). LCMS (ESI+): *m/z* 313.2 [M+H]<sup>+</sup>, (ESI-): *m/z* 311.1 [M-H]<sup>-</sup>, rt 1.70 minutes, >99%. HRMS (ESI): *m/z* calculated for C<sub>15</sub>H<sub>11</sub>F<sub>2</sub>N<sub>6</sub> [M+H]<sup>+</sup> requires 313.1008, found 313.1004. Rf: 0.34 (100% EtOAc).

### 5-Chloro-6-(1-(3-fluorobenzyl)-1H-pyrazol-4-yl)pyrimidin-4-amine (28)

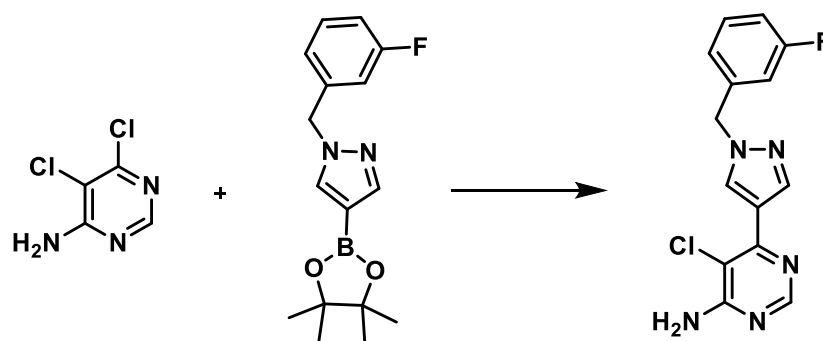

5,6-Dichloropyrimidin-4-amine **6** (98 mg) and **54** (0.199 g) were reacted following the General Procedure A to obtain the product **28** as a white solid (20-80 % EtOAc/PE gradient) (39 mg, 22 %).

$^1\text{H}$  NMR (400 MHz, DMSO- $d_6$ ):  $\delta$  8.71 (d,  $J$  = 0.7 Hz, 1H), 8.25 (s, 1H), 8.20 (d,  $J$  = 0.7 Hz, 1H), 7.41 (m, 1H), 7.28 (br s, 2H), 7.13 (m, 3H), 5.44 (s, 2H).  $^{13}\text{C}$  NMR (101 MHz, DMSO- $d_6$ )  $\delta$  162.2 (d,  $J$  = 244 Hz), 160.6, 155.5, 152.4, 140.4, 139.9 (d,  $J$  = 7.4 Hz), 132.7, 130.7 (d,  $J$  = 8.3 Hz), 123.9 (d,  $J$  = 2.8 Hz), 119.2, 114.7 (d,  $J$  = 21.0 Hz), 114.6 (d,  $J$  = 21.8 Hz), 107.1, 54.4.  $^{19}\text{F}$  NMR (376 MHz, DMSO- $d_6$ )  $\delta$  -113.0. LCMS:  $m/z$   $[\text{M}+\text{H}]^+$  304.1, rt 1.54 min, >99 %. HRMS: (ESI)  $m/z$  calculated for  $\text{C}_{14}\text{H}_{12}\text{N}_5\text{FCl}$   $[\text{M}+\text{H}]^+$  requires 304.0760, found 304.0758. R<sub>f</sub>: 0.43 (80% EtOAc/hexanes).

### 2-Amino-4-(1-(3-fluorobenzyl)-1H-pyrazol-4-yl)nicotinonitrile (29)

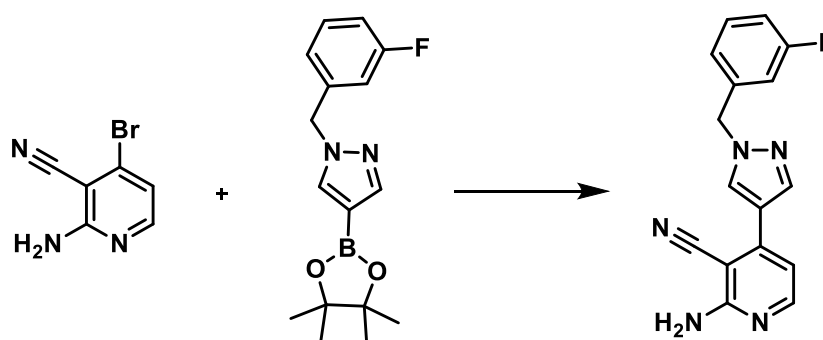

2-Amino-4-bromonicotinonitrile **7** (59 mg, 0.3 mmol) and **54** (100 mg, 0.33 mmol) were reacted following the General Procedure A to obtain the product **29** as a white solid (60-100 % EtOAc/PE gradient) (54 mg, 61 %).

$^1\text{H}$  NMR (500 MHz, DMSO- $d_6$ ):  $\delta$  8.55 (s, 1H), 8.10 (m, 2H), 7.40 (m, 1H), 7.12 (m, 3H), 6.84 (d,  $J$  = 5.3 Hz, 1H), 6.81 (br s, 2H), 5.44 (s, 2H).  $^{13}\text{C}$  NMR (126 MHz, DMSO- $d_6$ )  $\delta$  162.2 (d,  $J$  = 243 Hz), 161.4, 152.7, 144.5, 139.8 (d,  $J$  = 7.3 Hz), 138.7, 130.7 (d,  $J$  = 8.2 Hz), 130.5, 123.8 (d,  $J$  = 2.7 Hz), 117.7, 114.7 (d,  $J$  = 20.7 Hz), 114.6 (d,  $J$  = 21.9 Hz), 110.3, 85.1, 54.5.  $^{19}\text{F}$  NMR (376 MHz, DMSO- $d_6$ )  $\delta$  -113.0. LCMS:  $m/z$   $[\text{M}+\text{H}]^+$  294.2, rt 1.59 mins, >99 %. HRMS (ESI):  $m/z$  calculated for  $\text{C}_{16}\text{H}_{13}\text{N}_5\text{F}$   $[\text{M}+\text{H}]^+$  requires 294.1150, found 294.1153. R<sub>f</sub>: 0.60 (100% EtOAc).



### 2,3-Dichloro-4-(1-(3-fluorobenzyl)-1H-pyrazol-4-yl)pyridine (66)

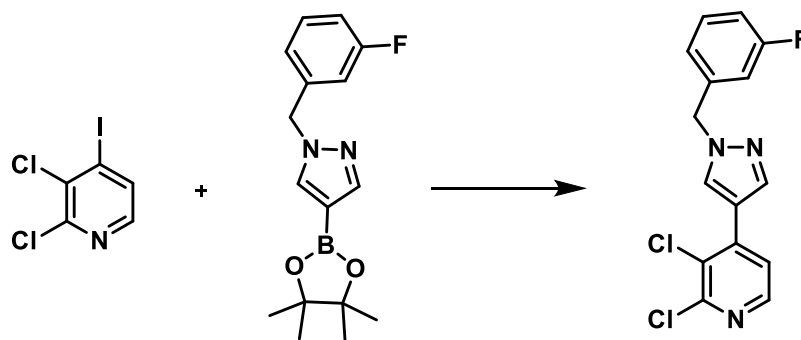

2,3-Dichloro-4-iodopyridine **55** (0.292 g, 1.06 mmol) and **54** (0.355 g, 1.18 mmol) were reacted following the General Procedure A to obtain the product **66** as a white solid (20-80 % EtOAc/PE gradient) (0.191 g, 56 %).

$^1\text{H}$  NMR (400 MHz,  $\text{DMSO-}d_6$ )  $\delta$  8.73 (d,  $J = 0.8$  Hz, 1H), 8.32 (d,  $J = 5.2$  Hz, 1H), 8.19 (d,  $J = 0.8$  Hz, 1H), 7.75 (d,  $J = 5.2$  Hz, 1H), 7.42 (m, 1H), 7.14 (m, 3H), 5.46 (s, 2H).  $^{19}\text{F}$  NMR (376 MHz,  $\text{DMSO-}d_6$ )  $\delta$  -113.0. LCMS:  $m/z$   $[\text{M}+\text{H}]^+$  322.1,  $r_t$  2.15 min (>99%). HRMS: (ESI)  $m/z$  calculated  $[\text{M}+\text{H}]^+$   $\text{C}_{15}\text{H}_{11}\text{N}_3\text{Cl}_2\text{F} = 322.0309$ , observed 322.0313;  $R_f$ : 0.70 (70% EtOAc/hexanes)

### 5-Chloro-6-(1-(3-fluorobenzyl)-1H-pyrazol-4-yl)pyrimidin-4-amine (30)

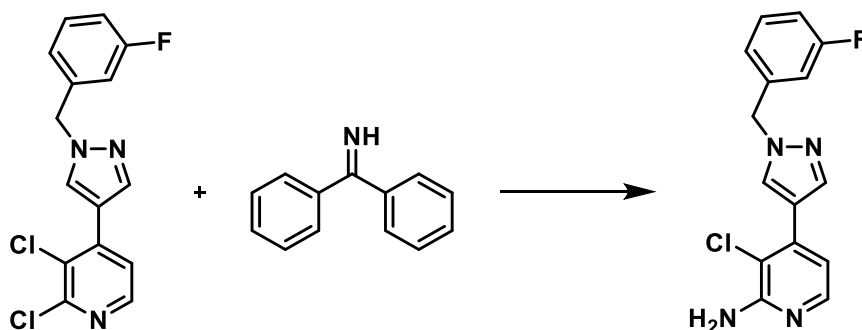

To a stirred solution of **66** (81 mg, 0.25 mmol) in toluene (2 mL) was added sodium *t*-butoxide (34.1 mg, 0.36 mmol), bis(di(phenylphosphino)binaphthyl) (25 mg, 0.04 mmol), tris(dibenzylideneacetone)dipalladium(0) (15 mg, 0.016 mmol) and benzophenone imine (52  $\mu\text{L}$ , 0.31 mmol) and the mixture was degassed for 5 min. The reaction mixture was then heated to 80  $^\circ\text{C}$  and stirred overnight in a sealed tube. The mixture was cooled and a solution of 1M HCl (4 mL) and THF (4 mL) added. The reaction was stirred at RT for 5 h. The resulting aqueous mixture was washed with EtOAc. The aqueous layer was basified with  $\text{NaHCO}_3$  (aqueous sat. solution) and extracted with EtOAc. The organic layer was dried ( $\text{MgSO}_4$ ) and evaporated *in vacuo*. The crude product was purified by column chromatography (20-90 % EtOAc/PE gradient) to yield a white solid (48 mg, 0.158 mmol, 63 %).

$^1\text{H}$  NMR (500 MHz,  $\text{DMSO-}d_6$ )  $\delta$  8.52 (d,  $J = 0.8$  Hz, 1H), 8.01 (d,  $J = 0.8$  Hz, 1H), 7.82 (d,  $J = 5.2$  Hz, 1H), 7.39 (td,  $J = 8.0, 6.1$ , 1H), 7.11 (m, 3H), 6.79 (d,  $J = 5.2$  Hz, 1H), 6.25 (s, 2H), 5.41 (s, 2H).  $^{13}\text{C}$  NMR (126 MHz,  $\text{DMSO-}d_6$ )  $\delta$  162.2 (d,  $J = 244$  Hz), 156.7, 145.8, 140.1 (d,  $J = 7.4$  Hz), 139.4, 138.4, 131.1, 130.7 (d,  $J = 8.3$  Hz), 123.8 (d,  $J = 2.8$  Hz), 117.6, 114.6 (d,  $J = 20.9$  Hz), 114.5 (d,  $J = 21.9$  Hz), 112.2, 109.7, 54.3 (d,  $J = 1.9$  Hz).  $^{19}\text{F}$  NMR (376 MHz,  $\text{DMSO-}d_6$ )  $\delta$  -113.0. LCMS:  $m/z$   $[\text{M} + \text{H}]^+$  303.1, retention time 1.37 mins, (>99%). HRMS: (ESI)  $m/z$  calculated for  $\text{C}_{15}\text{H}_{13}\text{N}_4\text{FCl}$   $[\text{M}+\text{H}]^+$  requires 303.0807, observed 303.0813.  $R_f$ : 0.17 (50% EtOAc/hexane).

### 6-(1-(3-Fluorobenzyl)-1H-pyrazol-4-yl)pyrimidin-4-amine (31)

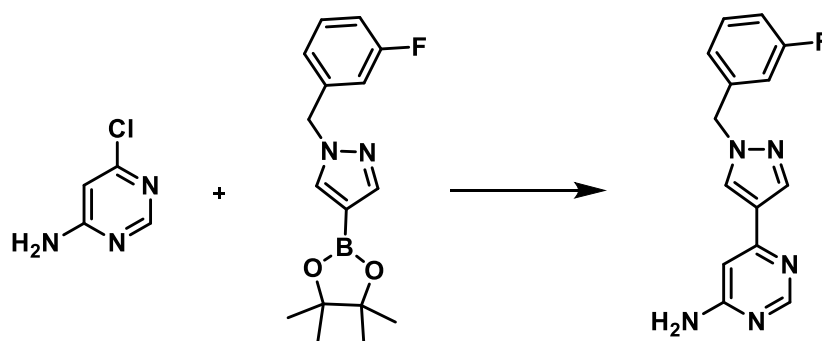

4-Amino-6-chloropyrimidine **8** (78 mg) and **54** (199 mg) were reacted following the General Procedure A to obtain the product as a yellow solid (0-5 % MeOH/EtOAc gradient) (56 mg, 35 %).

<sup>1</sup>H NMR (400 MHz, DMSO-*d*<sub>6</sub>) δ 8.41 (s, 1H), 8.30 (s, 1H), 7.96 (s, 1H), 7.46 – 7.35 (m, 1H), 7.19 – 7.07 (m, 3H), 6.75 (s, 2H), 6.57 (s, 1H), 5.40 (s, 2H). <sup>13</sup>C NMR (100 MHz, DMSO-*d*<sub>6</sub>) δ 164.4, 162.6 (d, *J* = 244 Hz), 159.0, 156.5, 140.4 (d, *J* = 7.3 Hz), 138.3, 131.1 (d, *J* = 8.4 Hz), 130.4, 124.2 (d, *J* = 2.8 Hz), 122.2, 115.0 (d, *J* = 20.9 Hz), 114.9 (d, *J* = 21.7 Hz), 98.6, 54.8. <sup>19</sup>F NMR (376 MHz, DMSO-*d*<sub>6</sub>) δ -113.1. R<sub>f</sub>: 0.09 (100% EtOAc).

### (4-Iodo-1H-pyrazol-1-yl)(morpholino)methanone (36)<sup>2</sup>

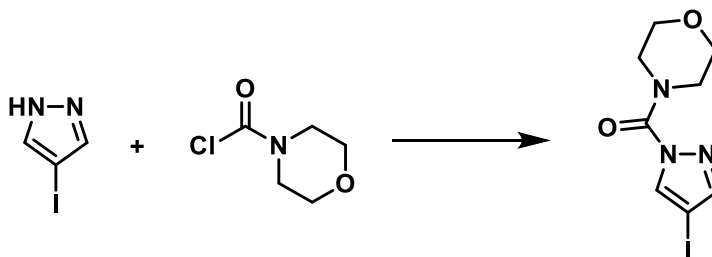

To a solution of 4-iodopyrazole **35** (582 mg, 3 mmol, 1 eq) and triethylamine (0.46 mL, 3.3 mmol, 1.1 eq) in DCM (15 mL) was added 4-morpholinecarbonyl chloride (0.38 mL, 3.3 mmol, 1.1 eq). The reaction was left to stir overnight at rt. The reaction was then diluted with brine and the mixture was extracted with EtOAc. The combined organic layer was washed with saturated aq. NaHCO<sub>3</sub>, brine and dried over MgSO<sub>4</sub> and evaporated. The crude product was purified by column chromatography (10-40 % EtOAc/PE) to yield a white solid (0.623 g, 63 %).

<sup>1</sup>H NMR (400 MHz, CDCl<sub>3</sub>) δ 8.20 (s, 1H), 7.63 (s, 1H), 3.98 – 3.71 (m, 8H). <sup>13</sup>C NMR (101 MHz, CDCl<sub>3</sub>) δ 149.8, 146.6, 136.4, 66.7, 59.9. LCMS (ESI<sup>+</sup>): *m/z* 114.2 [M+H]<sup>+</sup>, (ESI<sup>-</sup>): *m/z* 117.0 [M-H]<sup>-</sup>, rt 1.61 minutes, 100%. HRMS (ESI): *m/z* calculated for C<sub>8</sub>H<sub>10</sub>IN<sub>3</sub>O<sub>2</sub>Na [M+Na]<sup>+</sup> requires 329.9710, found 329.9715. R<sub>f</sub>: 0.38 (33% EtOAc/hexanes).

### Morpholino(4-(4,4,5,5-tetramethyl-1,3,2-dioxaborolan-2-yl)-1H-pyrazol-1-yl)methanone (37)<sup>3</sup>

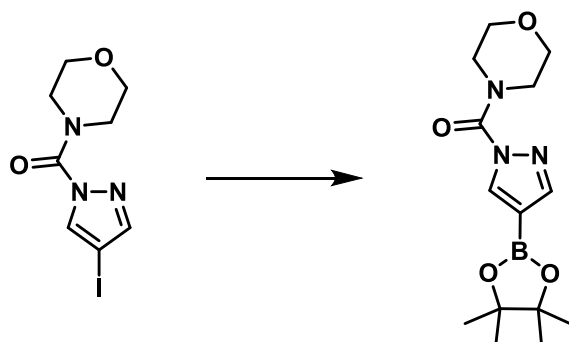

A sealed tube was charged with **36** (200 mg, 0.65 mmol, 1 mmol), bis(pinacolato)diboron (231 mg, 0.91 mmol, 1.4 mmol), KOAc (255 mg, 2.6 mmol, 4 mmol), Pd(dppf)Cl<sub>2</sub>.DCM (27 mg, 0.03 mmol, 5 mol%) and DMSO (3 mL). The mixture was degassed and purged with N<sub>2</sub> for 10 min then it was heated at 80 °C for 3 h. The reaction was cooled to rt, diluted with EtOAc and filtered through a pad of celite. The filtrate was washed with brine, dried over Na<sub>2</sub>SO<sub>4</sub> and evaporated. The crude product was purified by column chromatography (40-100 % EtOAc/PE) to yield a white solid (105 mg, 53 %).

<sup>1</sup>H NMR (400 MHz, CDCl<sub>3</sub>) δ 8.43 (s, 1H), 7.87 (s, 1H), 4.02 – 3.72 (m, 8H), 1.35 (s, 12H). <sup>13</sup>C NMR (101 MHz, CDCl<sub>3</sub>) δ 150.9, 146.9, 139.2, 83.8, 77.2, 66.7, 24.8. LCMS (ESI+): m/z 308.2 [M+H]<sup>+</sup>, (ESI-): m/z 324.0 [M+H<sub>2</sub>O-H]<sup>-</sup>, rt 1.77 minutes, 86%. HRMS (ESI): m/z calculated for C<sub>14</sub>H<sub>22</sub>BN<sub>3</sub>O<sub>4</sub>Na [M+Na]<sup>+</sup> requires 330.1596, found 330.1600. R<sub>f</sub>: 0.27 (70% EtOAc/hexanes).

#### General procedure B: Synthesis of pyrazole-4-boronic acid pinacol ester derivatives<sup>4</sup>

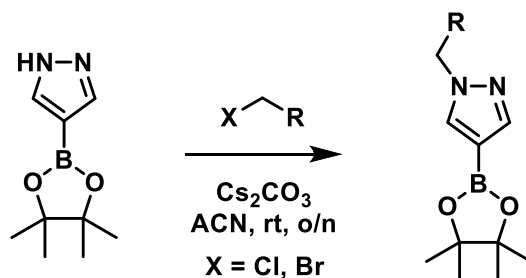

To a solution of pyrazole-4-boronic acid pinacol ester (3 mmol, 1 eq) in acetonitrile (to make up a 0.6 M solution) was added Cs<sub>2</sub>CO<sub>3</sub> (9 mmol, 3 eq) and corresponding alkyl halide (6 mmol, 2 eq). The mixture was stirred at rt for 16 h. The insoluble material was removed by filtration and the filtrate was concentrated *in vacuo* to afford a crude product. The residue was purified by silica gel flash column chromatography (Biotage Isolera system, 12 g silica column, using a mixture of EtOAc/PE) to afford the desired product.

**1-Morpholino-2-(4-(4,4,5,5-tetramethyl-1,3,2-dioxaborolan-2-yl)-1H-pyrazol-1-yl)ethan-1-one (38c)**

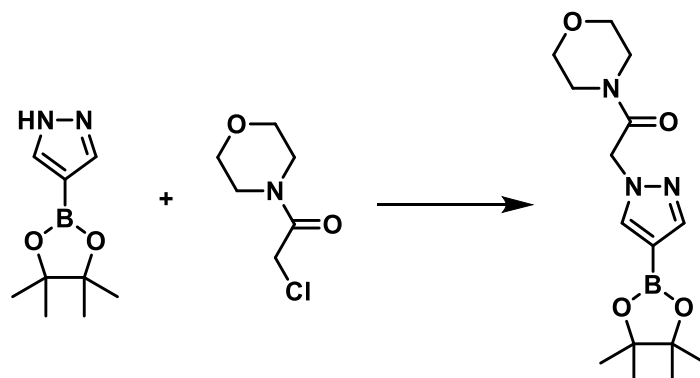

To a solution of pyrazole-4-boronic acid pinacol ester (250 mg, 1.3 mmol, 1 eq) in acetonitrile (2 mL) was added  $K_2CO_3$  (534 mg, 3.9 mmol, 3 eq) and 4-(chloroacetyl)morpholine (421 mg, 2.6 mmol, 2 eq). The mixture was heated at 70 °C for 16 h. The reaction was allowed to cool to rt. The mixture was diluted with ethyl acetate and washed with water. The organic layer separated and dried with  $MgSO_4$  and concentrated *in vacuo* to afford a crude yellow oil (400 mg) which was used without further purification.

**3-((4-(4,4,5,5-Tetramethyl-1,3,2-dioxaborolan-2-yl)-1H-pyrazol-1-yl)methyl)pyridine (51)**

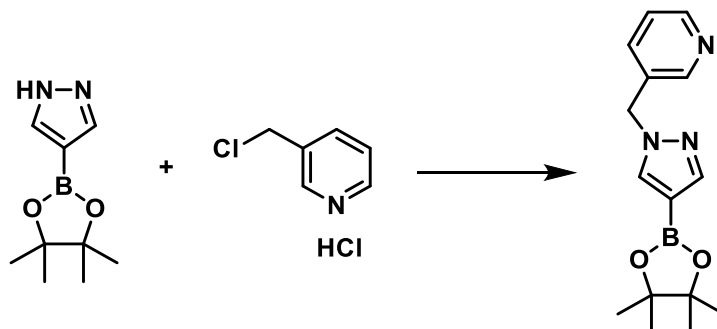

Pyrazole-4-boronic acid pinacol ester (0.582 g) and 3-(chloromethyl)pyridine.HCl **39** (0.984 g) were reacted following the General Procedure B to obtain the product as a white solid (20-100 % EtOAc/PE gradient) (332 mg, 39%).

$^1H$  NMR (400 MHz, acetone- $d_6$ ):  $\delta$  8.60 (d,  $J$  = 2.4 Hz, 1H), 8.52 (dd,  $J$  = 4.8, 1.7 Hz, 1H), 7.98 (s, 1H), 7.69 (dt,  $J$  = 7.7, 1.9 Hz, 1H), 7.65 (s, 1H), 7.35 (m, 1H), 5.46 (s, 2H), 1.29 (s, 12H).  $^{13}C$  NMR (100 MHz, acetone- $d_6$ )  $\delta$  149.3, 149.1, 145.3, 136.6, 135.3, 132.9, 123.4, 82.9, 52.5, 24.2.  $^{11}B$  NMR (128 MHz, acetone- $d_6$ ):  $\delta$  29.7. LCMS:  $m/z$   $[M+H]^+$  286.3, rt 1.49 min >99%. HRMS: (ESI)  $m/z$  calculated for  $C_{15}H_{21}BO_2N_3$   $[M+H]^+$  286.1721, observed 286.1726.  $R_f$ : 0.14 (70% EtOAc/hexanes)

#### 4-((4-(4,4,5,5-Tetramethyl-1,3,2-dioxaborolan-2-yl)-1H-pyrazol-1-yl)methyl)pyridine (52)

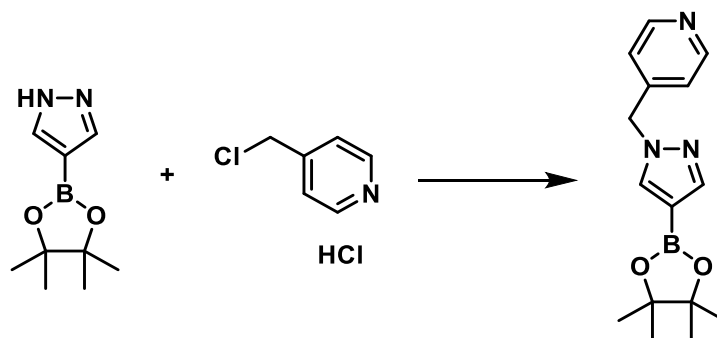

Pyrazole-4-boronic acid pinacol ester (582 mg) and 4-(chloromethyl)pyridine.HCl **40** (984 mg) were reacted following the General Procedure B to obtain the product as a colourless oil (40-100 % EtOAc/PE gradient) (326 mg, 38%) which turns orange after a few days at ambient temperature storage.

$^1\text{H}$  NMR (400 MHz, Acetone- $d_6$ )  $\delta$  8.54 (dd,  $J$  = 4.5, 1.5 Hz, 2H), 8.00 (s, 1H), 7.68 (s, 1H), 7.16 (d,  $J$  = 5.8 Hz, 2H), 5.47 (s, 2H), 1.30 (s, 12H).  $^{13}\text{C}$  NMR (100 MHz, Acetone- $d_6$ )  $\delta$  149.9, 146.3, 145.4, 137.1, 122.1, 82.9, 53.7, 24.2.  $^{11}\text{B}$  NMR (128 MHz, Acetone- $d_6$ )  $\delta$  29.6. LCMS (ESI $^+$ ):  $m/z$  286.3 [ $\text{M}+\text{H}$ ] $^+$ , (ESI $^-$ ):  $m/z$  302.0 [ $\text{M}+\text{H}_2\text{O}-\text{H}$ ] $^-$ , rt 1.29 min, >99%. HRMS (ESI):  $m/z$  calculated for  $\text{C}_{15}\text{H}_{21}\text{BN}_3\text{O}_2$  [ $\text{M}+\text{H}$ ] $^+$  requires 286.1721, found 286.1722.  $R_f$ : 0.27 (70% EtOAc/hexanes).

#### 3-Methoxy-5-((4-(4,4,5,5-tetramethyl-1,3,2-dioxaborolan-2-yl)-1H-pyrazol-1-yl)methyl)pyridine (53)

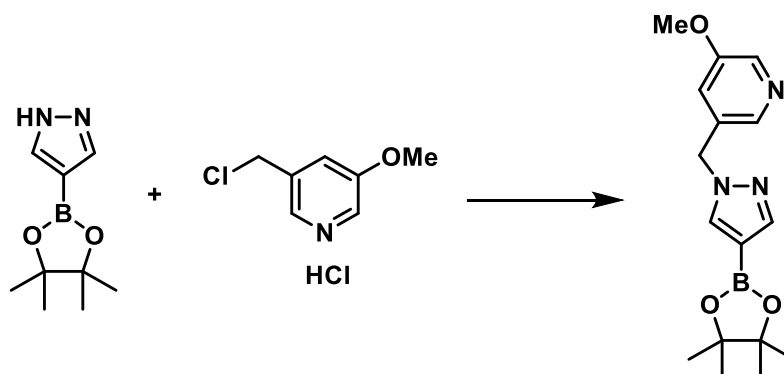

Pyrazole-4-boronic acid pinacol ester (330 mg, 1.7 mmol) and 3-(chloromethyl)-5-methoxypyridine.HCl **41** (495 mg, 3.4 mmol) were reacted following the General Procedure B to obtain the product as a clear colourless oil (40-100 % EtOAc/PE gradient) (167 mg, 31%).

$^1\text{H}$  NMR (400 MHz, Acetone- $d_6$ )  $\delta$  8.23 (d,  $J$  = 2.7 Hz, 1H), 8.18 (d,  $J$  = 1.2 Hz, 1H), 7.96 (s, 1H), 7.64 (s, 1H), 7.31 – 7.27 (m, 1H), 5.43 (s, 2H), 3.87 (s, 3H), 1.29 (s, 12H).  $^{13}\text{C}$  NMR (100 MHz, Acetone- $d_6$ )  $\delta$  155.7, 145.2, 141.3, 136.9, 136.6, 133.5, 119.7, 82.9, 55.1, 52.4, 24.2.  $R_f$ : 0.25 (100% EtOAc).

#### 1-(3-Fluorobenzyl)-4-(4,4,5,5-tetramethyl-1,3,2-dioxaborolan-2-yl)-1H-pyrazole (54)

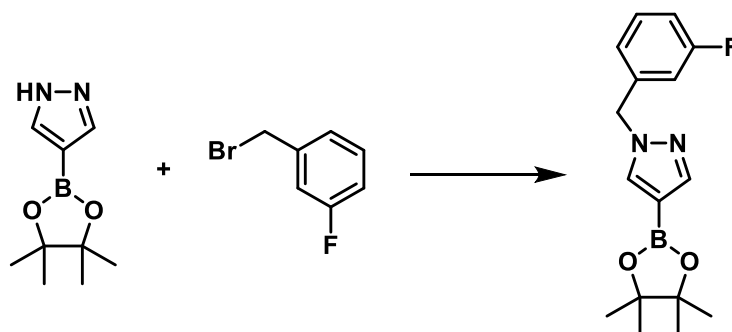

Pyrazole-4-boronic acid pinacol ester (582 mg) and 3-fluorobenzyl bromide **42** (0.74 mL, 1.13 g) were reacted following the General Procedure B to obtain the product as a clear colourless oil (0-50 % EtOAc/PE gradient) (673 mg, 74%).

$^1\text{H}$  NMR (400 MHz, acetone- $d_6$ ):  $\delta$  7.95 (s, 1H), 7.65 (s, 1H), 7.40 (m, 1H), 7.09 (m, 3H), 5.43 (s, 2H), 1.29 (s, 12H).  $^{13}\text{C}$  NMR (100 MHz, acetone- $d_6$ )  $\delta$  162.8 (d,  $J = 244.4$  Hz), 145.2, 140.4 (d,  $J = 7.4$  Hz), 136.7, 130.4 (d,  $J = 8.3$  Hz), 123.6 (d,  $J = 2.9$  Hz), 114.4 (d,  $J = 22.4$  Hz), 114.3 (d,  $J = 21.6$  Hz), 82.9, 54.4, 24.2.  $^{19}\text{F}$  NMR (376 MHz, acetone- $d_6$ )  $\delta$  -114.6;  $^{11}\text{B}$  NMR (128 MHz, Acetone- $d_6$ )  $\delta$  29.9; LCMS:  $m/z$   $[\text{M}+\text{H}]^+$  303.2, rt 2.15 min, (86%); HRMS: (ESI)  $m/z$  calculated for  $\text{C}_{16}\text{H}_{21}\text{N}_2\text{O}_2\text{BF}$   $[\text{M}+\text{H}]^+$  303.1674, observed 303.1681; R<sub>f</sub>: 0.48 (30% EtOAc/hexanes).

#### 4-(4,4,5,5-Tetramethyl-1,3,2-dioxaborolan-2-yl)-1-(3-(trifluoromethyl)benzyl)-1H-pyrazole (55)

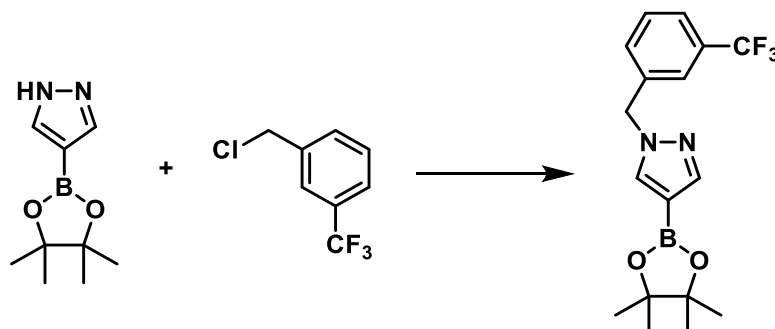

Pyrazole-4-boronic acid pinacol ester (0.582 g) and 3-(trifluoromethyl)benzyl chloride **43** (0.93 mL, 1.17 g) were reacted following the General Procedure B to obtain the product as a clear colourless oil (0-40 % EtOAc/PE gradient) (1.15 g, 99%).

$^1\text{H}$  NMR (400 MHz, Acetone- $d_6$ )  $\delta$  8.00 (s, 1H), 7.69 – 7.65 (m, 3H), 7.62 – 7.58 (m, 2H), 5.53 (s, 2H), 1.29 (s, 12H).  $^{13}\text{C}$  NMR (100 MHz, Acetone- $d_6$ )  $\delta$  140.2, 146.6, 138.0, 132.9 (app d,  $J = 1.2$  Hz), 131.4 (q,  $J = 31.9$  Hz), 130.7, 125.5 (q,  $J = 271$  Hz), 84.1, 55.6, 25.4.  $^{19}\text{F}$  NMR (376 MHz, Acetone- $d_6$ )  $\delta$  -63.1.  $^{11}\text{B}$  NMR (128 MHz, Acetone- $d_6$ )  $\delta$  29.4. LCMS (ESI+):  $m/z$  353.2  $[\text{M}+\text{H}]^+$ , rt 2.22 min, 93%; HRMS: (ESI)  $m/z$  calculated for  $\text{C}_{17}\text{H}_{21}\text{N}_2\text{O}_2\text{BF}_3$   $[\text{M}+\text{H}]^+$  353.1643, observed 353.1642; R<sub>f</sub>: 0.51 (20% EtOAc/hexanes).

### 1-(3-Fluoro-5-methoxybenzyl)-4-(4,4,5,5-tetramethyl-1,3,2-dioxaborolan-2-yl)-1H-pyrazole (56)

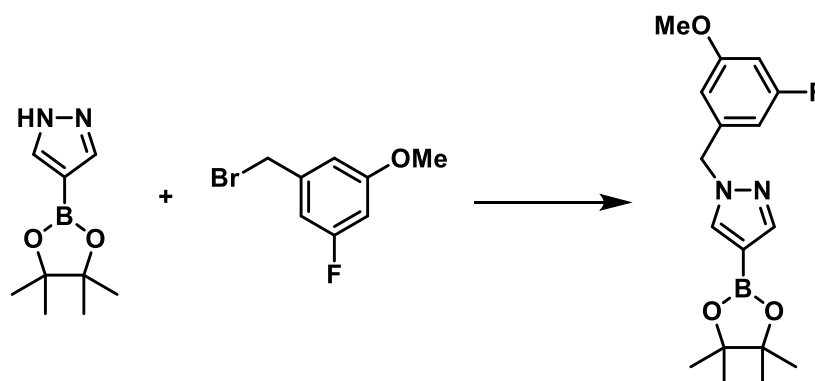

Pyrazole-4-boronic acid pinacol ester (0.388 g, 2 mmol) and 3-fluoro-5-methoxybenzyl bromide **44** (0.876 g, 4 mmol) were reacted following the General Procedure B to obtain the product as a white solid (0-50 % EtOAc/PE gradient) (0.540 g, 81%).

$^1\text{H}$  NMR (400 MHz, Acetone- $d_6$ )  $\delta$  7.94 (s, 1H), 7.65 (s, 1H), 6.75 – 6.70 (m, 1H), 6.67 (dt,  $J$  = 10.9, 2.3 Hz, 1H), 6.64 – 6.59 (m, 1H), 5.38 (s, 2H), 3.81 (s, 3H), 1.29 (s, 12H).  $^{13}\text{C}$  NMR (100 MHz, Acetone- $d_6$ )  $\delta$  163.5 (d,  $J$  = 243 Hz), 161.4 (d,  $J$  = 11.5 Hz), 145.1, 140.8 (d,  $J$  = 9.6 Hz), 136.7, 109.8 (d,  $J$  = 2.7 Hz), 106.3 (d,  $J$  = 22.7 Hz), 100.3 (d,  $J$  = 25.4 Hz), 82.9, 55.1, 54.5, 24.2.  $^{19}\text{F}$  NMR (376 MHz, Acetone- $d_6$ )  $\delta$  -113.1.  $^{11}\text{B}$  NMR (128 MHz, Acetone- $d_6$ )  $\delta$  29.5. LCMS (ESI+):  $m/z$  333.2  $[\text{M}+\text{H}]^+$ , rt 2.11 min, 92%. HRMS: (ESI)  $m/z$  calculated for  $\text{C}_{17}\text{H}_{23}\text{N}_2\text{O}_3\text{BF}$   $[\text{M}+\text{H}]^+$  333.1781, observed 333.1781; Rf: 0.51 (20% EtOAc/hexanes).

### 1-(4-Fluorobenzyl)-4-(4,4,5,5-tetramethyl-1,3,2-dioxaborolan-2-yl)-1H-pyrazole (57)

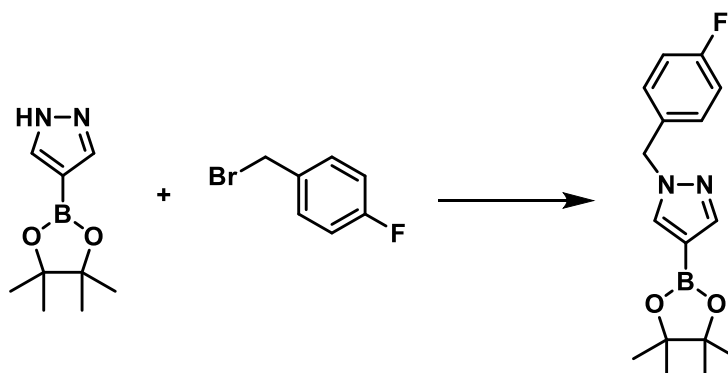

Pyrazole-4-boronic acid pinacol ester (0.388 g, 2 mmol) and 4-fluorobenzyl bromide **45** (0.756 g, 4 mmol) were reacted following the General Procedure B to obtain the product as a clear colourless oil (0-50 % EtOAc/PE gradient) (0.460 g, 76%).

$^1\text{H}$  NMR (400 MHz, Acetone- $d_6$ )  $\delta$  7.90 (s, 1H), 7.63 (s, 1H), 7.38 (dd,  $J$  = 8.5, 5.5 Hz, 2H), 7.13 (t,  $J$  = 8.8 Hz, 2H), 5.39 (s, 2H), 1.29 (s, 12H).  $^{13}\text{C}$  NMR (100 MHz, Acetone- $d_6$ )  $\delta$  162.3 (d,  $J$  = 244 Hz), 145.0, 136.3, 133.6 (d,  $J$  = 3.2 Hz), 129.9 (d,  $J$  = 8.3 Hz), 115.2 (d,  $J$  = 21.7 Hz), 82.9, 54.2, 24.2.  $^{19}\text{F}$  NMR (376 MHz, Acetone- $d_6$ )  $\delta$  -116.4.  $^{11}\text{B}$  NMR (128 MHz, Acetone- $d_6$ )  $\delta$  29.6. LCMS:  $m/z$   $[\text{M}+\text{H}]^+$  303.2, rt 2.06 min, 86%; HRMS: (ESI)  $m/z$  calculated for  $\text{C}_{16}\text{H}_{21}\text{N}_2\text{O}_2\text{BF}$   $[\text{M}+\text{H}]^+$  303.1674, observed 303.1675; Rf: 0.27 (20% EtOAc/hexanes).

### 1-Benzyl-4-(4,4,5,5-tetramethyl-1,3,2-dioxaborolan-2-yl)-1H-pyrazole (58)

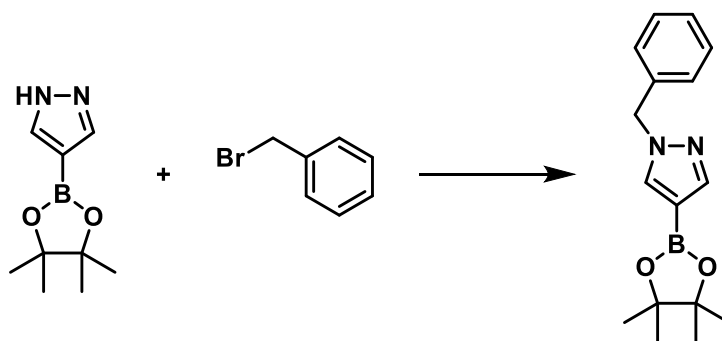

Pyrazole-4-boronic acid pinacol ester (0.582 g) and benzyl bromide **46** (0.7 mL, 1.02 g) were reacted following the General Procedure B to obtain the product as a clear colourless oil (0-50 % EtOAc/PE gradient) (0.645 g, 76%).

$^1\text{H}$  NMR (400 MHz, Acetone- $d_6$ )  $\delta$  7.88 (s, 1H), 7.63 (s, 1H), 7.40 – 7.28 (m, 5H), 5.39 (s, 2H), 1.29 (s, 12H).  $^{13}\text{C}$  NMR (100 MHz, Acetone- $d_6$ )  $\delta$  144.9, 137.5, 136.3, 128.5, 127.8, 127.7, 82.9, 55.1, 24.2.  $^{11}\text{B}$  NMR (128 MHz, Acetone- $d_6$ )  $\delta$  29.5. LCMS:  $m/z$   $[\text{M}+\text{H}]^+$  285.2, rt 2.05 min, 88%; HRMS: (ESI)  $m/z$  calculated for  $\text{C}_{16}\text{H}_{22}\text{N}_2\text{O}_2\text{B}$   $[\text{M}+\text{H}]^+$  285.1769, observed 285.1767; Rf: 0.49 (20% EtOAc/hexanes).

### 1-(1-Phenylethyl)-4-(4,4,5,5-tetramethyl-1,3,2-dioxaborolan-2-yl)-1H-pyrazole (59)

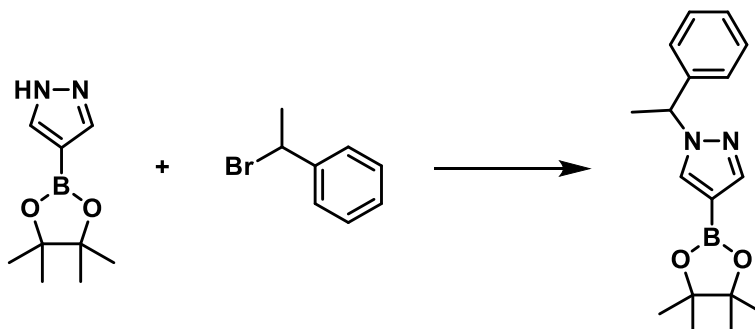

Pyrazole-4-boronic acid pinacol ester (0.388 g, 2 mmol) and (1-bromoethyl)benzene **47** (0.55 mL, 740 mg, 4 mmol) were reacted following the General Procedure B to obtain the product as a clear colourless oil (0-30 % EtOAc/PE gradient) (0.290 g, 45%).

$^1\text{H}$  NMR (400 MHz, Acetone- $d_6$ )  $\delta$  7.87 (s, 1H), 7.64 (s, 1H), 7.41 – 7.26 (m, 5H), 5.66 (q,  $J = 7.1$  Hz, 1H), 1.90 (d,  $J = 7.1$  Hz, 3H), 1.29 (s, 12H).  $^{13}\text{C}$  NMR (100 MHz, Acetone- $d_6$ )  $\delta$  144.5, 142.5, 134.9, 128.4, 127.5, 126.4, 82.8, 60.7, 24.2, 20.8.  $^{11}\text{B}$  NMR (128 MHz, Acetone- $d_6$ )  $\delta$  29.6. LCMS:  $m/z$   $[\text{M}+\text{H}]^+$  299.2, rt 2.14 min, 81%; HRMS: (ESI)  $m/z$  calculated for  $\text{C}_{17}\text{H}_{23}\text{N}_2\text{O}_2\text{BNa}$   $[\text{M}+\text{Na}]^+$  321.1745, observed 321.1743; Rf: 0.40 (20% EtOAc/hexanes)



### 1-Phenethyl-4-(4,4,5,5-tetramethyl-1,3,2-dioxaborolan-2-yl)-1H-pyrazole (60)

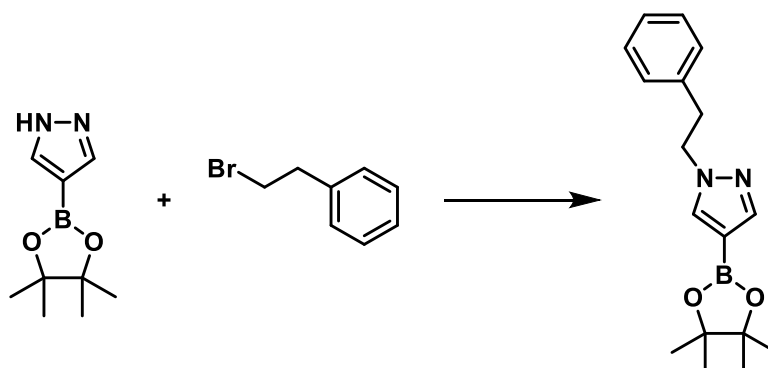

Pyrazole-4-boronic acid pinacol ester (388 mg, 2 mmol) and (2-bromoethyl)benzene **48** (0.54 mL, 740 mg, 4 mmol) were reacted following the General Procedure B to obtain the product as a clear colourless oil (0-30 % EtOAc/PE gradient) (206 mg, 35%).

$^1\text{H}$  NMR (400 MHz, Acetone- $d_6$ )  $\delta$  7.69 (s, 1H), 7.62 (s, 1H), 7.32 – 7.17 (m, 5H), 4.41 (t,  $J$  = 7.4 Hz, 2H), 3.19 (t,  $J$  = 7.4 Hz, 2H), 1.28 (s, 12H).  $^{13}\text{C}$  NMR (100 MHz, Acetone- $d_6$ )  $\delta$  144.7, 138.5, 136.4, 128.7, 128.4, 126.4, 82.8, 52.7, 36.4, 24.2.  $^{11}\text{B}$  NMR (128 MHz, Acetone- $d_6$ )  $\delta$  29.5. LCMS:  $m/z$   $[\text{M}+\text{H}]^+$  299.2, rt 2.12 min, 89%; HRMS: (ESI)  $m/z$  calculated for  $\text{C}_{17}\text{H}_{24}\text{N}_2\text{O}_2\text{B}$   $[\text{M}+\text{H}]^+$  299.1925, observed 299.1926; R<sub>f</sub>: 0.55 (20% EtOAc/hexanes).

### 1-(3,5-Difluorobenzyl)-4-(4,4,5,5-tetramethyl-1,3,2-dioxaborolan-2-yl)-1H-pyrazole (61)

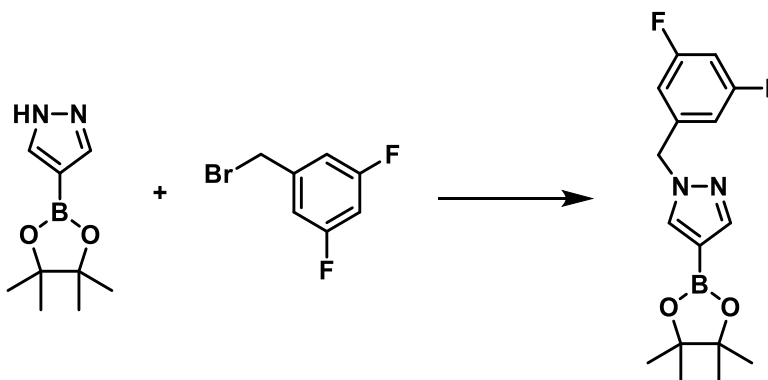

Pyrazole-4-boronic acid pinacol ester (388 mg, 2 mmol) and 3,5-difluorobenzyl bromide **49** (828 mg, 4 mmol) were reacted following the General Procedure B to obtain the product as a pale yellow solid (0-30 % EtOAc/PE gradient) (452 mg, 71%).

$^1\text{H}$  NMR (400 MHz, Acetone- $d_6$ )  $\delta$  7.99 (s, 1H), 7.67 (s, 1H), 7.08 – 6.89 (m, 3H), 5.46 (s, 2H), 1.30 (s, 12H).  $^{13}\text{C}$  NMR (100 MHz, Acetone- $d_6$ )  $\delta$  163.1 (d,  $J$  = 239.0 Hz) 162.9 (d,  $J$  = 247 Hz), 145.4, 142.1 (app t,  $J$  = 9.1 Hz), 136.9, 111.1 – 110.0 (m), 102.8 (app t,  $J$  = 25.8 Hz), 82.9, 53.9, 24.2.  $^{19}\text{F}$  NMR (376 MHz, acetone- $d_6$ )  $\delta$  -111.1.  $^{11}\text{B}$  NMR (128 MHz, Acetone- $d_6$ )  $\delta$  28.6. LCMS:  $m/z$   $[\text{M}+\text{H}]^+$  321.2, rt 2.13 min, (74%). HRMS: (ESI)  $m/z$  calculated for  $\text{C}_{16}\text{H}_{20}\text{N}_2\text{O}_2\text{BF}_2$   $[\text{M}+\text{H}]^+$  321.1580, observed 321.1587. R<sub>f</sub>: 0.43 (20% EtOAc/hexanes).

### 1-(3,4-Difluorobenzyl)-4-(4,4,5,5-tetramethyl-1,3,2-dioxaborolan-2-yl)-1H-pyrazole (62)

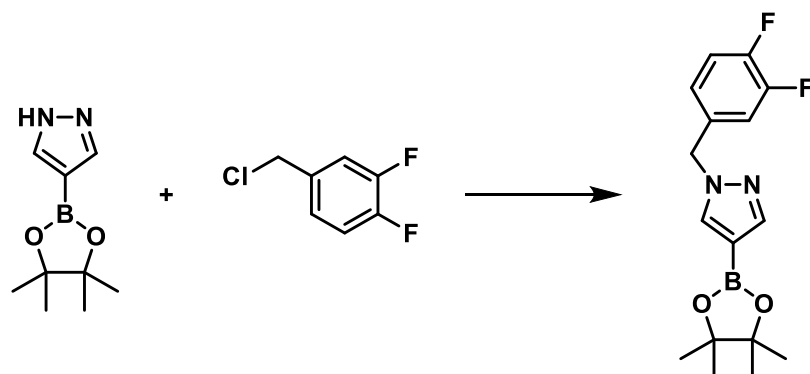

Pyrazole-4-boronic acid pinacol ester (388 mg, 2 mmol) and 3,5-difluorobenzyl chloride **50** (650 mg, 4 mmol) were reacted following the General Procedure B to obtain the product as a clear colourless oil (0-30 % EtOAc/PE gradient) (367 mg, 57%).

$^1\text{H}$  NMR (400 MHz, Acetone- $d_6$ )  $\delta$  7.96 (s, 1H), 7.65 (s, 1H), 7.37 – 7.25 (m, 2H), 7.20 – 7.14 (m, 1H), 5.41 (s, 2H), 1.29 (s, 12H).  $^{13}\text{C}$  NMR (100 MHz, Acetone- $d_6$ )  $\delta$  149.9 (dd,  $J = 246.5, 13.0$  Hz), 149.6 (dd,  $J = 245.9, 12.4$  Hz), 145.2, 136.6, 135.1 (dd,  $J = 5.6, 3.8$  Hz), 124.5 (dd,  $J = 6.6, 3.7$  Hz), 117.4 (d,  $J = 17.4$  Hz), 116.9 (d,  $J = 17.8$  Hz), 82.9, 53.8, 24.2.  $^{19}\text{F}$  NMR (376 MHz, DMSO- $d_6$ )  $\delta$  -139.4 (d,  $J = 20.8$  Hz), -141.2 (d,  $J = 20.8$  Hz).  $^{11}\text{B}$  NMR (128 MHz, Acetone- $d_6$ )  $\delta$  29.7. LCMS:  $m/z$   $[\text{M}+\text{H}]^+$  321.2, rt 2.11 min, 84%. HRMS: (ESI)  $m/z$  calculated for  $\text{C}_{16}\text{H}_{20}\text{N}_2\text{O}_2\text{BF}_2$   $[\text{M}+\text{H}]^+$  321.1580, observed 321.1586. R<sub>f</sub>: 0.29 (20% EtOAc/hexanes).

### 2,4-Dibromonicotinonitrile (64)<sup>5</sup>

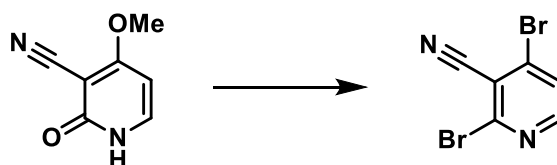

3-Cyano-4-methoxy-2-pyridone **63** (5.0 g, 33.3 mmol) was dissolved in acetonitrile (134 mL) and  $\text{POBr}_3$  (17.9 g, 62.5 mmol) was added. The reaction mixture was stirred for 16 h at 80 °C. Water (100 mL) and brine (100 mL) were added and the solution extracted with EtOAc ( $3 \times 100$  mL). The combined organic extracts were washed with  $\text{NaHCO}_3$  sat. solution (100 mL), the organic layer separated, and the aqueous layer extracted with EtOAc ( $2 \times 100$  mL). The organic extracts were combined, dried ( $\text{Na}_2\text{SO}_4$ ), filtered and evaporated until dryness. The solid residue was treated with diisopropyl ether, the resulting solid filtered, dried *in vacuo* and purified by column chromatography (multiple columns, 50-100 % EtOAc in PE) to yield the product as a white solid (4.36 g, 16.6 mmol, 50 %).

$^1\text{H}$  NMR (400 MHz, DMSO- $d_6$ ):  $\delta$  8.52 (d,  $J = 5.4$  Hz, 1H), 8.05 (d,  $J = 5.4$  Hz, 1H);  $^{13}\text{C}$  NMR (100 MHz, DMSO- $d_6$ )  $\delta$  153.9, 144.5, 138.5, 127.9, 116.6, 115.9; LCMS:  $m/z$   $[\text{M} + \text{H}]^+$  279.4, rt 1.78 min, >99%. R<sub>f</sub>: 0.90 (100% EtOAc).

### 2-Amino-4-bromonicotinitrile (7)<sup>5</sup>

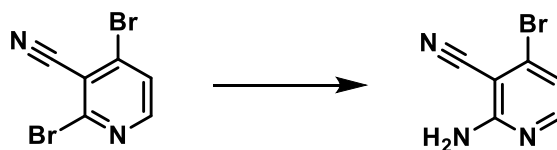

2,4-Dibromonicotinitrile **64** (1.0 g, 3.82 mmol) was dissolved in THF (8 mL) and aqueous ammonia (30 %, 8 mL) was added. The reaction mix was heated at 100 °C for 1 h in a sealed tube (Caution – done behind a blast shield). The reaction was cooled, washed with water (16 mL), and extracted with EtOAc (3 × 16 mL). The combined organic extracts were dried (Na<sub>2</sub>SO<sub>4</sub>), filtered and evaporated until dryness. Crude product was dissolved in DCM (approx. 10 mL) and the resulting solid (unwanted regioisomer) filtered off. The filtrate was collected and dried. The solid recovered was purified again using column chromatography (0-20 % EtOAc in DCM). This gave a white solid as the final product (92 mg, 0.467 mmol, 12 %).

<sup>1</sup>H NMR (400 MHz, DMSO-*d*<sub>6</sub>): δ 8.06 (d, *J* = 5.3 Hz, 1H), 7.24 (br s, 2H), 6.97 (d, *J* = 5.3 Hz, 1H). <sup>13</sup>C NMR (100 MHz, DMSO-*d*<sub>6</sub>) δ 161.7, 154.0, 137.0, 116.2, 116.0, 92.4. LCMS: *m/z* [M + H]<sup>+</sup> 200.0, rt 1.45 min, >99 %. HRMS: (ESI) *m/z* (calculated [M+H]<sup>+</sup> C<sub>6</sub>H<sub>5</sub>N<sub>3</sub>Br = 197.9661, observed 197.9667. R<sub>f</sub>: 0.33 (20% EtOAc in DCM)

## Isothermal Titration Calorimetry (ITC)

(a)

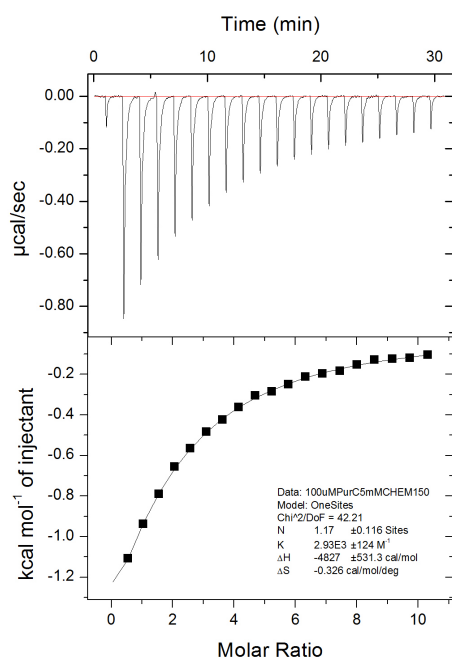

(b)

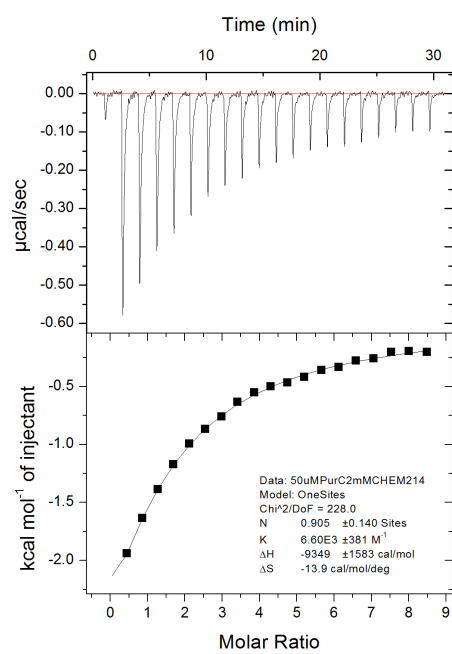

**Figure S1:** ITC traces between (a) 100  $\mu$ M *MabPurC* and 5 mM Fragment 1 (b) 50  $\mu$ M *MabPurC* and 2 mM compound 3.

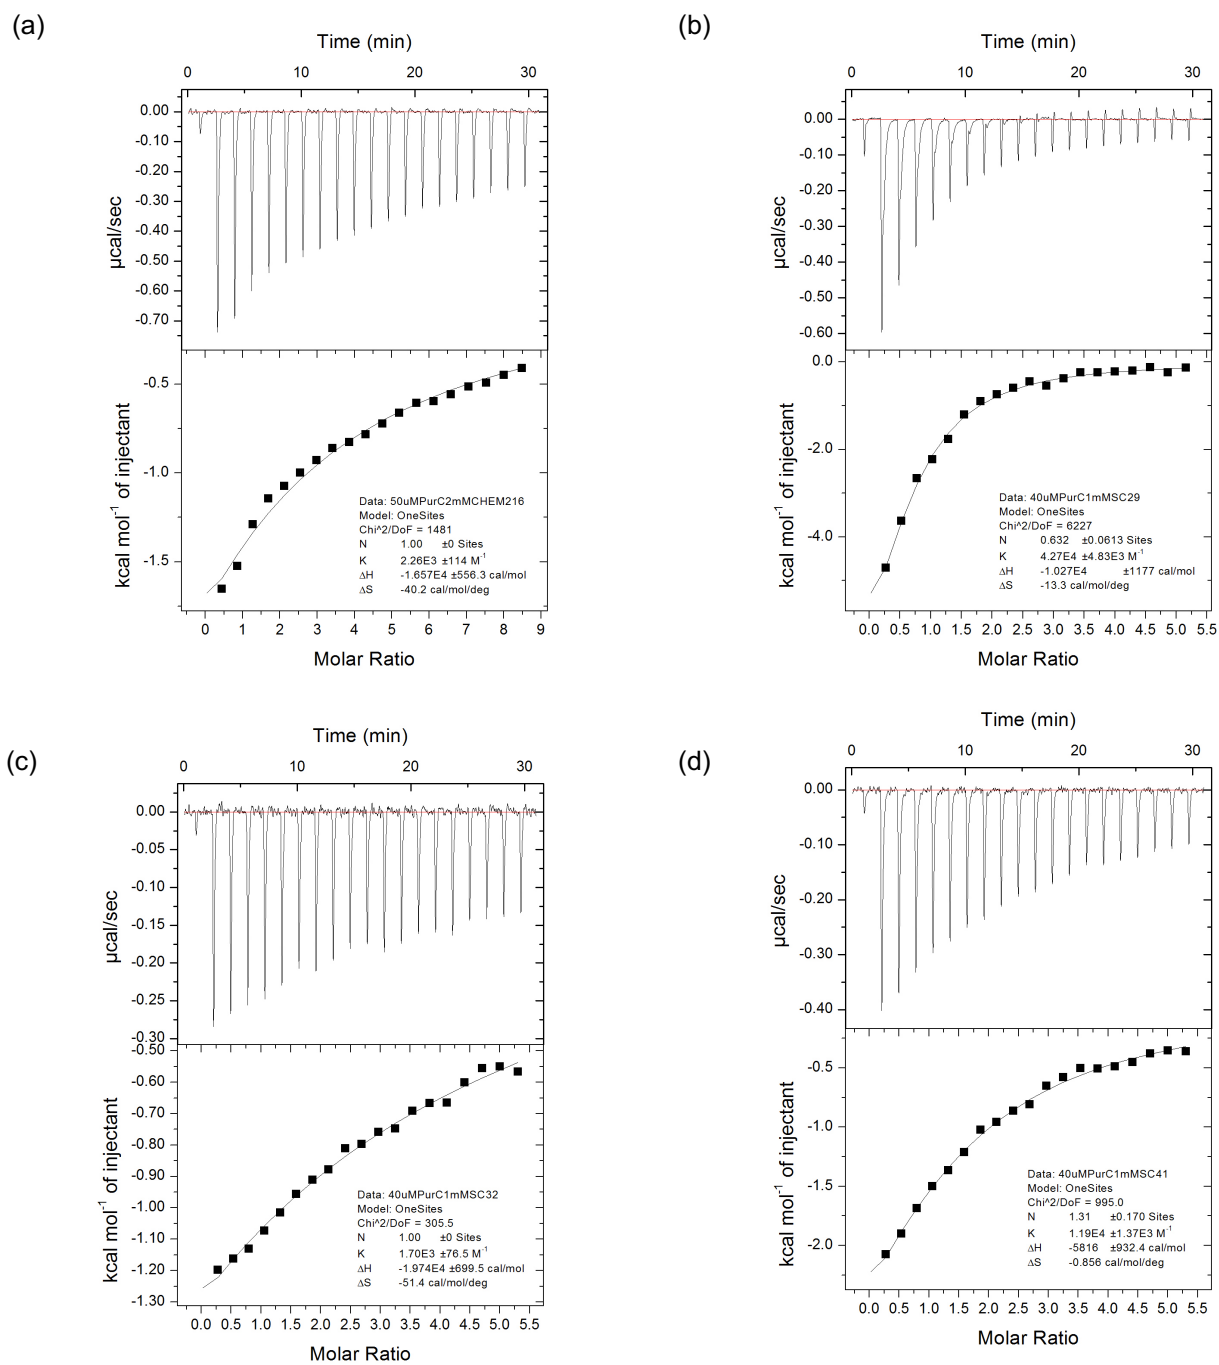

**Figure S2:** ITC traces between (a) 50  $\mu\text{M}$  MabPurC and 2 mM compound **6** (b) 40  $\mu\text{M}$  MabPurC and 1 mM compound **9** (c) 40  $\mu\text{M}$  MabPurC and 1 mM compound **10** and (d) 40  $\mu\text{M}$  MabPurC and 1 mM compound **11**.

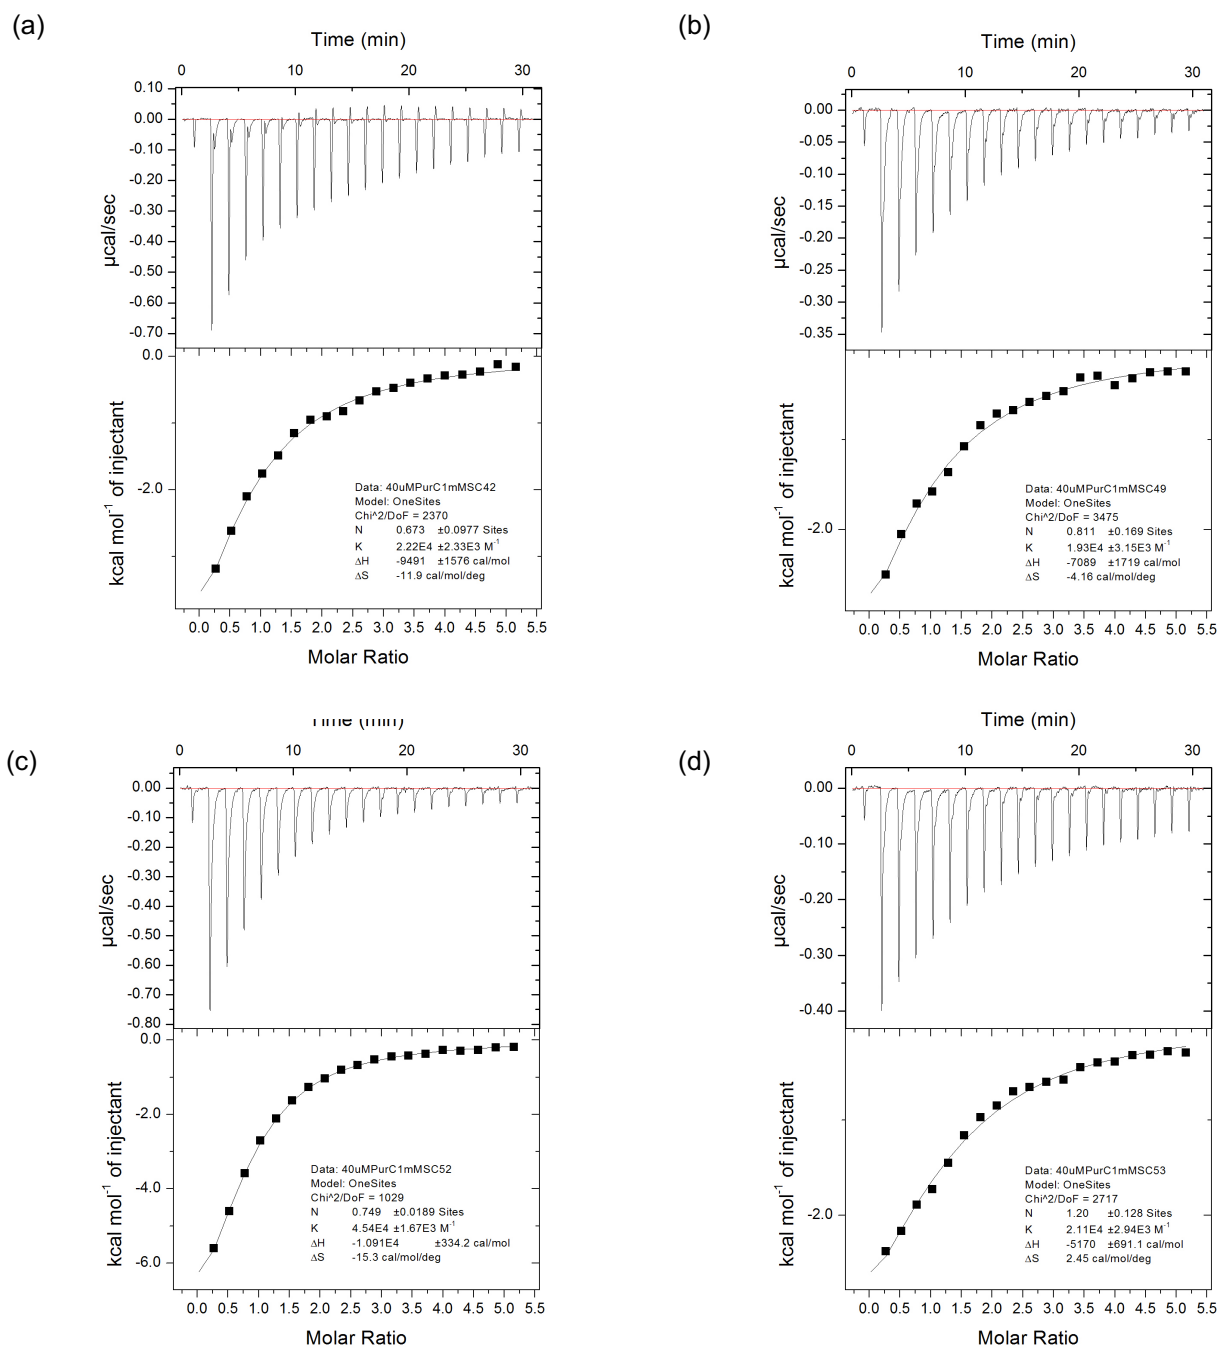

**Figure S3:** ITC traces between 40  $\mu\text{M}$  *MabPurC* and (a) 1 mM compound **12** (b) 1 mM compound **13** (c) 1 mM compound **14** and (d) 1 mM compound **15**

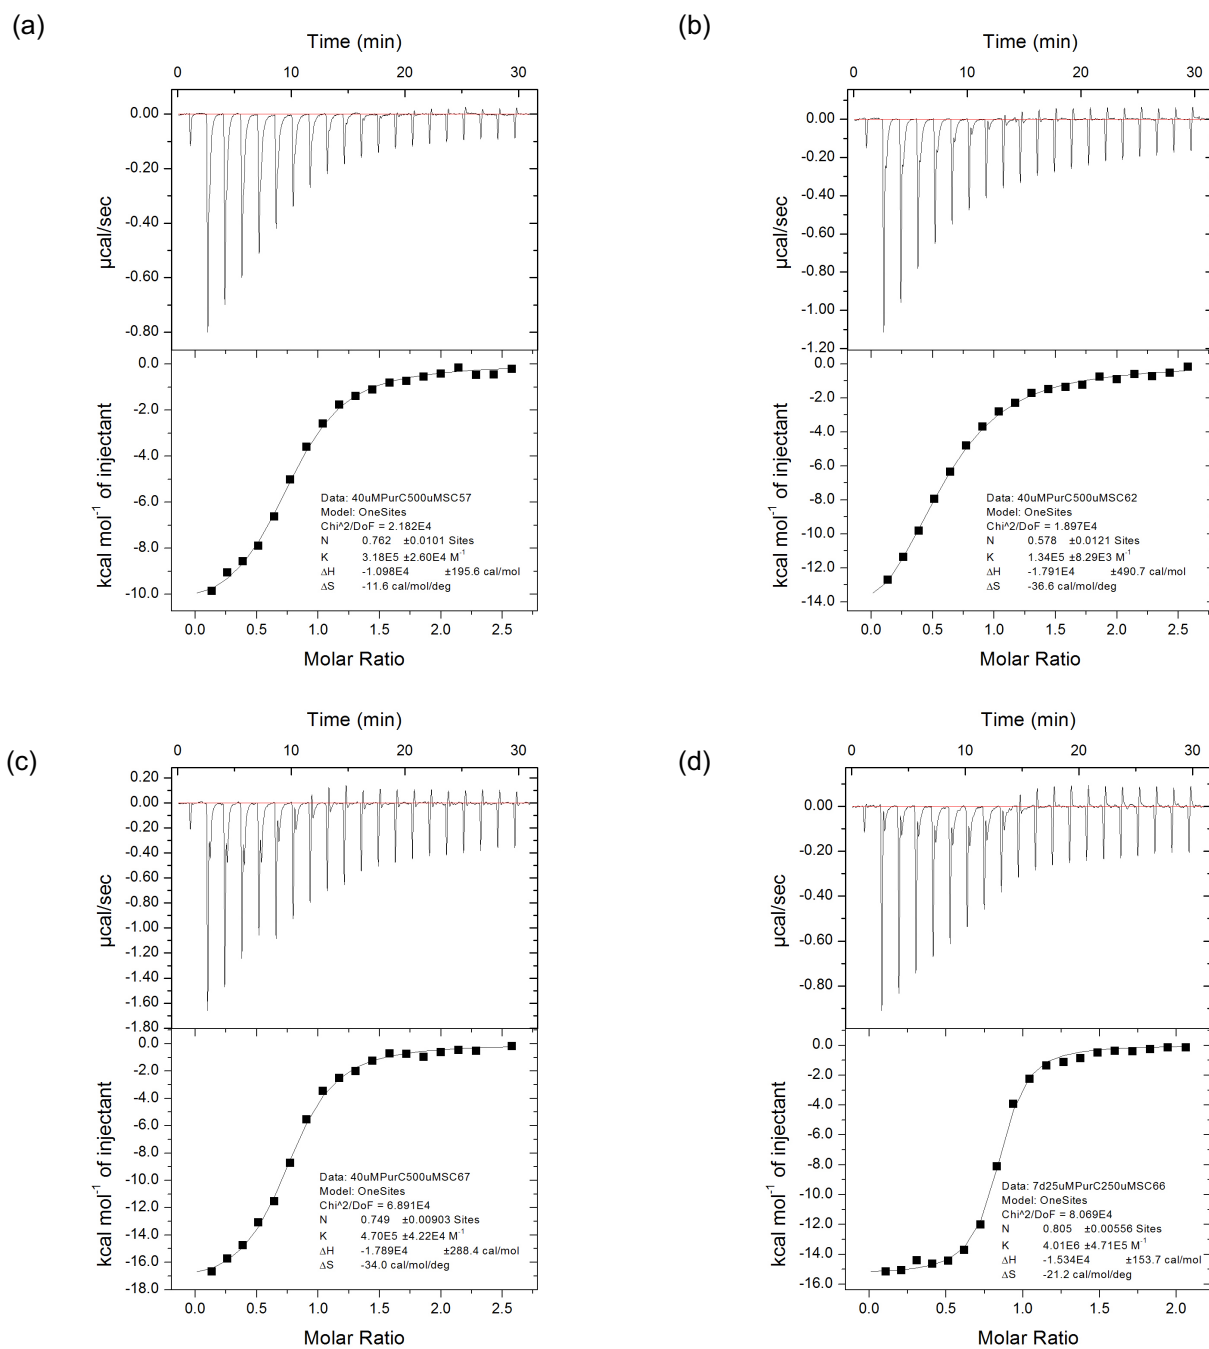

**Figure S4:** ITC traces between 40  $\mu\text{M}$  MabPurC and (a) 500  $\mu\text{M}$  compound **16** (b) 500  $\mu\text{M}$  compound **17** and (c) 500  $\mu\text{M}$  compound **18** and (d) ITC trace between 25  $\mu\text{M}$  MabPurC and 250  $\mu\text{M}$  compound **19** in the presence of 7% v/v DMSO

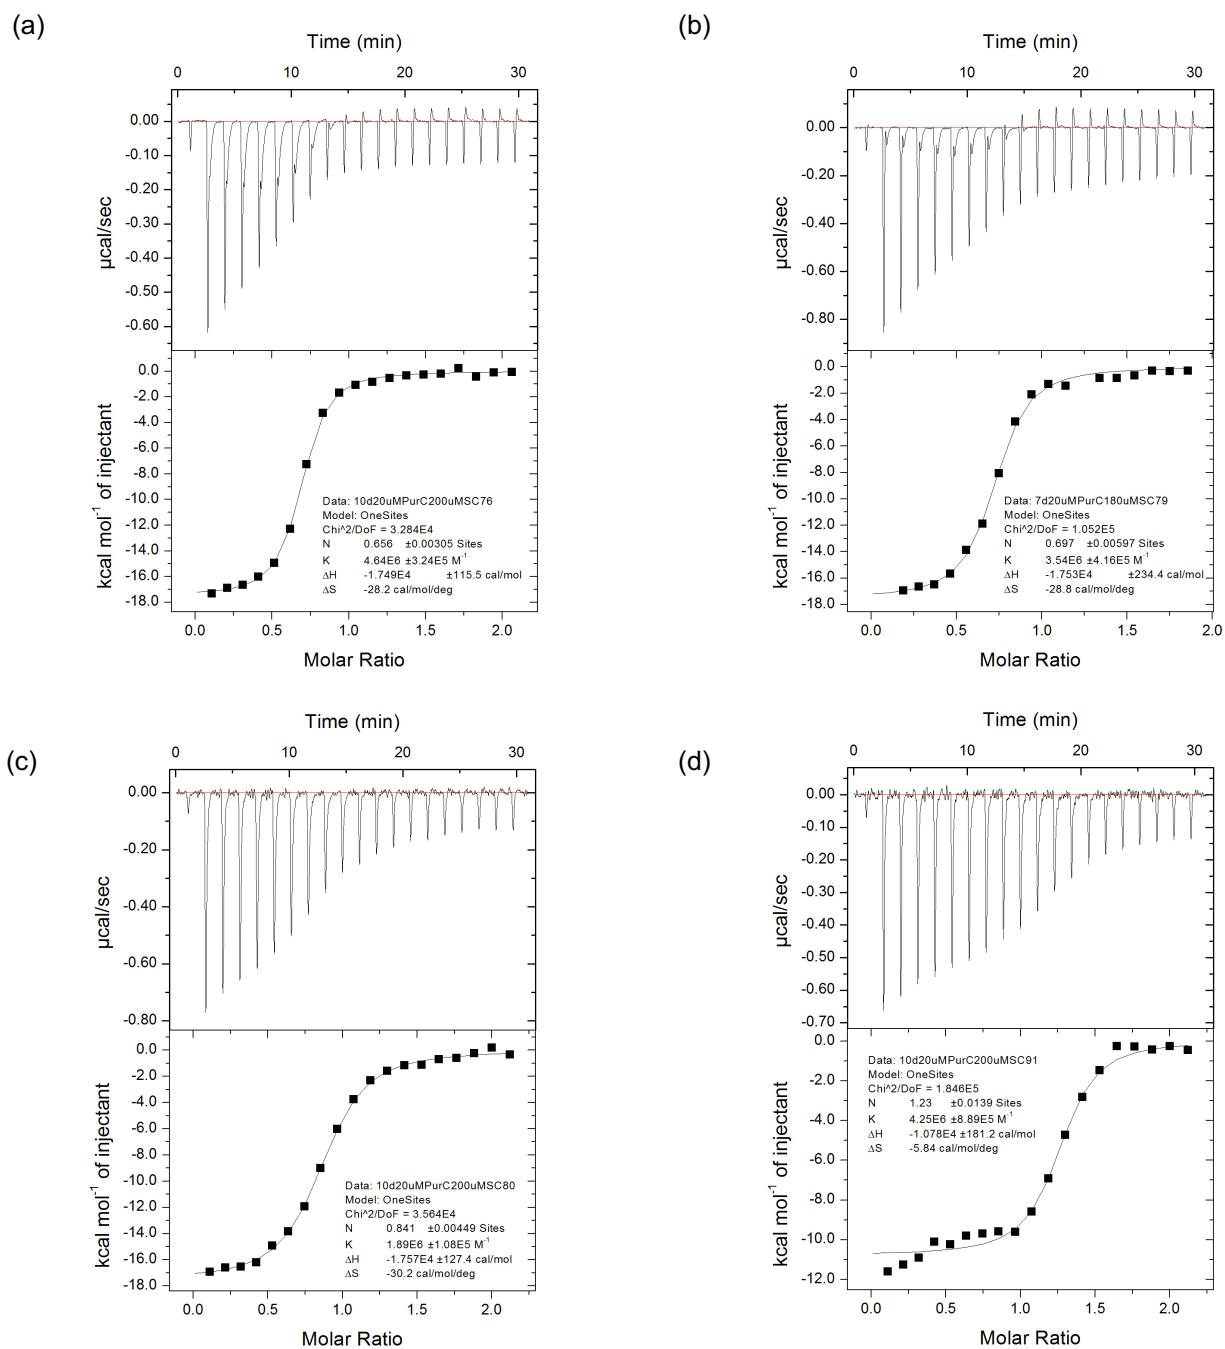

**Figure S5:** ITC traces between 20  $\mu\text{M}$  *MabPurC* and (a) 200  $\mu\text{M}$  compound **22** in the presence of 10% v/v DMSO (b) 180  $\mu\text{M}$  compound **23** in the presence of 7% v/v DMSO (c) 200  $\mu\text{M}$  compound **24** in the presence of 10% v/v DMSO and (d) 200  $\mu\text{M}$  compound **26** in the presence of 10% v/v DMSO



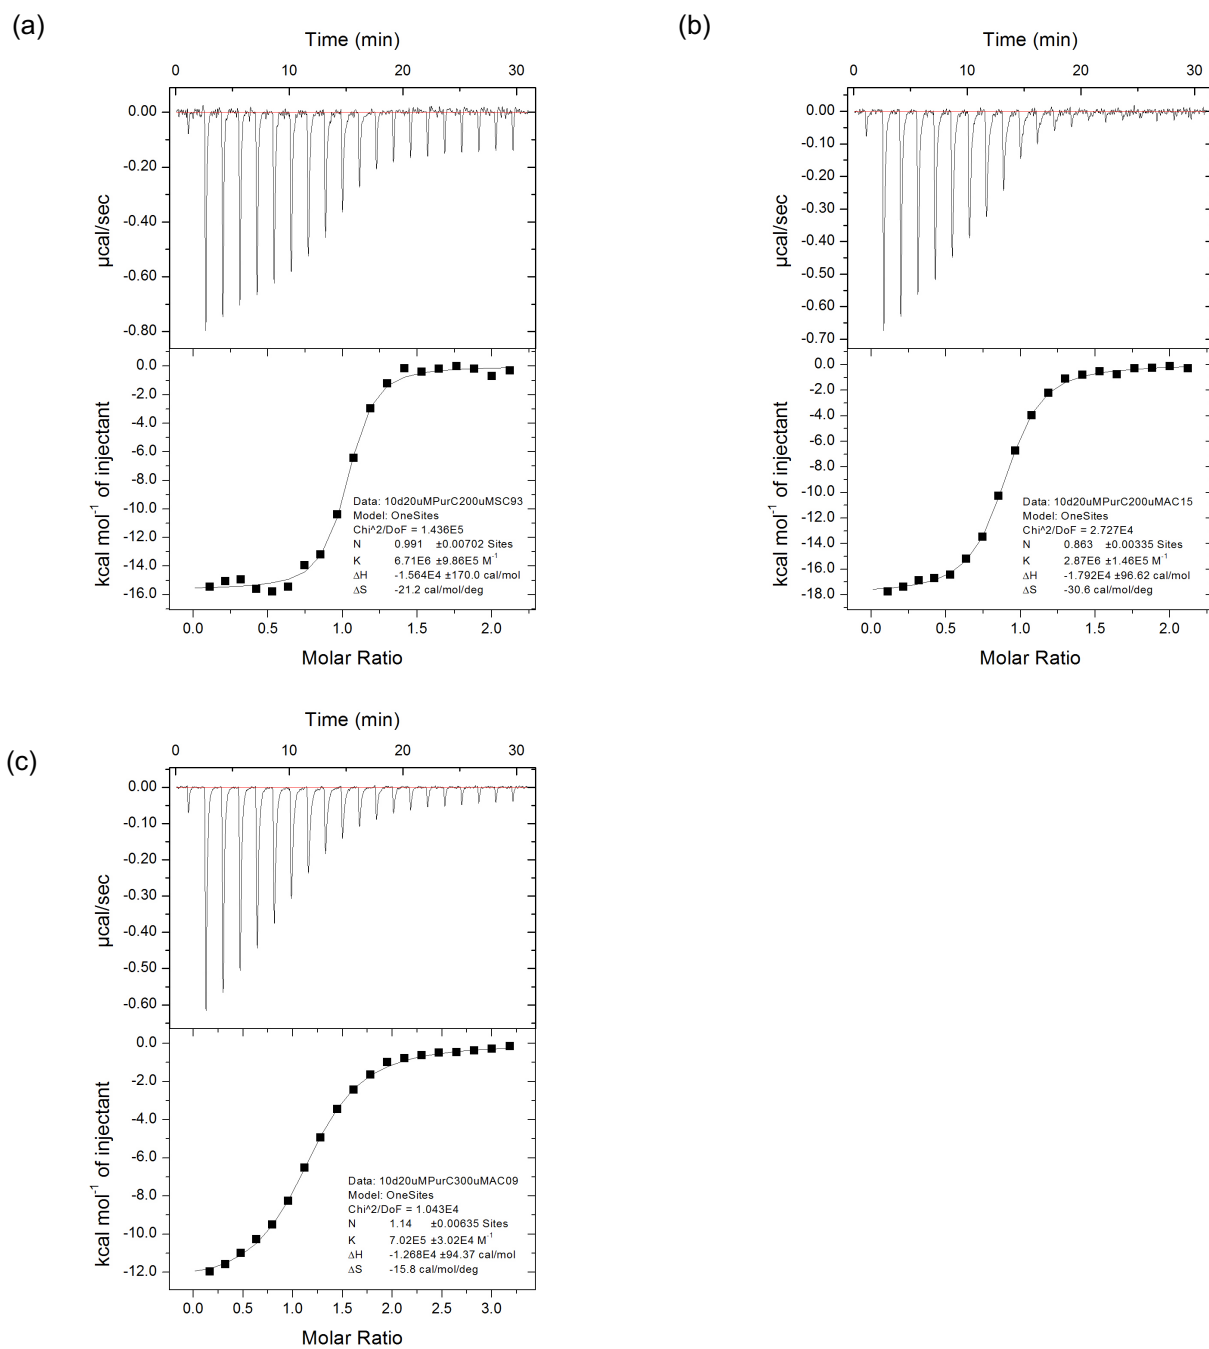

**Figure S6:** ITC traces in the presence of 10% v/v DMSO between 20  $\mu\text{M}$  *MabPurC* and (a) 200  $\mu\text{M}$  compound **27** (b) 200  $\mu\text{M}$  compound **28** and (c) 300  $\mu\text{M}$  compound **29**

```

M.abscessus/1-316      1 MRPS LSDYQHVASGKVRELYRVDDDEHLLFVATDRISAFDFVLDTPIPDKGRILTAMS 57
M.tuberculosis/1-316 1 MRPALSDYQHVASGKVRELYRVDDDEHLLLVASDRISAYDYVLDSTIPDKGRVLTAMS 57

M.abscessus/1-316     58 VFF 60 FGLLTVPNHLAGPPDDPRIPEEVLGRALLVRRLLDMLPVECVARGYL TGSGL 114
M.tuberculosis/1-316 58 AFF 60 FGLVDAPNHLAGPPDDPRIPEEVLGRALLVRRLEMLPVECVARGYL TGSGL 114

M.abscessus/1-316    115 LDYQRTGAV 120 CGHVL PQGLEEASRLDPPLFTPATKADIGEHD MNVDFAAVVG LV 171
M.tuberculosis/1-316 115 LDYQATGKV 120 CGIRLPPGLVEASRFATPLFTPATKAALGDH DENISFDRV VEMV 171

M.abscessus/1-316    172 GAVRANQLRDET IKIY 180 TRAAAHALHKGII LADTKFEFGVDIEGNLV LADEVFT 228
M.tuberculosis/1-316 172 GPLRANQLRDRT LQTY 180 VQAADHALTRGII LADTKFEFGIDRHGNLL LADEIFT 228

M.abscessus/1-316    229 PDS SRYWDAAHYQP GVVD SFDK 240 QFVRNWLTPESGWD RASDTPPPPLPDEVA 285
M.tuberculosis/1-316 229 PDS SRYWPADDYRAGV VQTSFDK 240 QFVRSWLTGSESGWDRGSDRPPPPLP EHV 285

M.abscessus/1-316    286 VATRERYIEAYERISGLS FSDWIGPSA 297 316
M.tuberculosis/1-316 286 EATRARIYNAYERISELKFDDWIGPGA 297 316

```

**Figure S7:** Multiple sequence alignment of *M. abscessus* and *M. tuberculosis* PurC orthologs coloured from white to dark purple indicating increasing percentage conservation of amino acid residues. The overall percentage identity between the two sequences is 75 %. The important catalytic residues and those involved in interactions with the lead compounds in this study are highlighted in pink box.

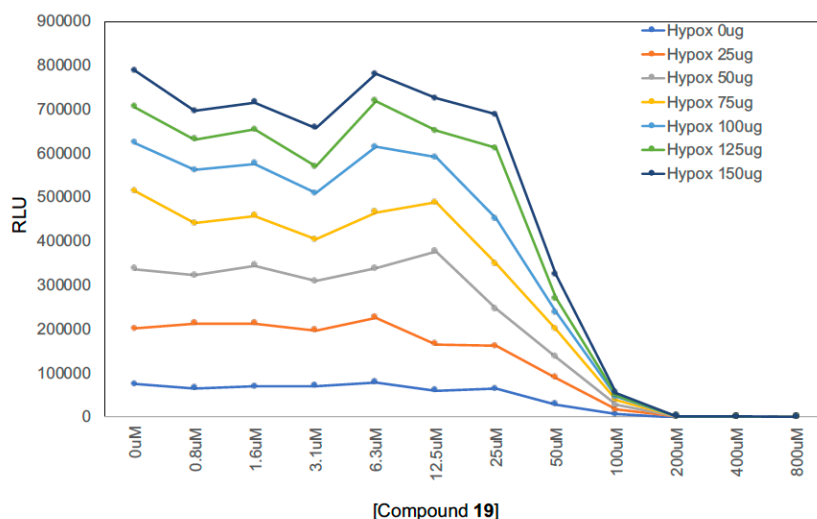

**Figure S8:** Hypoxanthine rescue experiment with Compound 19 in *Mab*. Hypoxanthine was added in at different concentrations to see whether this would show a rescue of PurC in *Mab* in the presence of compound 19. The readings were carried out after 48 hours

**Table S1:** Diffraction data and model refinement statistics

| Ligand                              | PurC free enzyme                 | PurC + ATP                        | PurC + Fragment 1                 |
|-------------------------------------|----------------------------------|-----------------------------------|-----------------------------------|
| <b>PDB Codes</b>                    | <b>6YVQ</b>                      | <b>6YX3</b>                       | <b>6Z0R</b>                       |
| <b>Resolution range (Å)</b>         | 45.02 - 1.479 (1.532 - 1.479)    | 37.16 - 1.22 (1.263 - 1.22)       | 45.07 - 1.308 (1.355 - 1.308)     |
| <b>Space group</b>                  | P 1 2 1 1                        | P 1 2 1 1                         | P 1 2 1 1                         |
| <b>Unit cell</b>                    | 48.078 64.287 48.02 90 110.55 90 | 47.758 64.114 49.013 90 111.48 90 | 47.493 64.729 48.238 90 110.88 90 |
| <b>Total reflections</b>            | 78975 (4271)                     | 122763 (1647)                     | 117608 (6927)                     |
| <b>Unique reflections</b>           | 41008 (2349)                     | 62427 (994)                       | 60940 (3997)                      |
| <b>Multiplicity</b>                 | 1.9 (1.8)                        | 2.0 (1.7)                         | 1.9 (1.7)                         |
| <b>Completeness (%)</b>             | 89.54 (51.77)                    | 76.39 (12.22)                     | 92.54 (60.97)                     |
| <b>Mean I/sigma(I)</b>              | 10.90 (2.09)                     | 23.35 (2.61)                      | 15.77 (2.13)                      |
| <b>Wilson B-factor</b>              | 16.52                            | 9.46                              | 15.5                              |
| <b>R-merge</b>                      | 0.03556 (0.229)                  | 0.02062 (0.3439)                  | 0.02211 (0.304)                   |
| <b>R-meas</b>                       | 0.05029                          | 0.02916                           | 0.03127                           |
| <b>CC1/2</b>                        | 0.996 (0.848)                    | 0.999 (0.658)                     | 0.999 (0.803)                     |
| <b>CC*</b>                          | 0.999 (0.958)                    | 1 (0.891)                         | 1 (0.944)                         |
| <b>R-work</b>                       | 0.1620 (0.2295)                  | 0.1614 (0.2948)                   | 0.1798 (0.2575)                   |
| <b>R-free</b>                       | 0.1968 (0.2740)                  | 0.1792 (0.3362)                   | 0.2022 (0.2930)                   |
| <b>Number of non-hydrogen atoms</b> | 2572                             | 2746                              | 2609                              |
| <b>macromolecules</b>               | 2270                             | 2293                              | 2281                              |
| <b>ligands</b>                      | 22                               | 47                                | 22                                |
| <b>water</b>                        | 280                              | 406                               | 306                               |
| <b>Protein residues</b>             | 295                              | 297                               | 295                               |
| <b>RMS(bonds)</b>                   | 0.006                            | 0.006                             | 0.006                             |
| <b>RMS(angles)</b>                  | 1                                | 1.1                               | 1.04                              |
| <b>Ramachandran favored (%)</b>     | 98                               | 98                                | 99                                |
| <b>Ramachandran outliers (%)</b>    | 0.34                             | 0.33                              | 0                                 |
| <b>Clashscore</b>                   | 1.56                             | 1.31                              | 1.11                              |
| <b>Average B-factor</b>             | 22.7                             | 16.9                              | 21.3                              |
| <b>macromolecules</b>               | 21.3                             | 14.6                              | 20.1                              |
| <b>ligands</b>                      | 28.8                             | 30                                | 21.4                              |
| <b>solvent</b>                      | 33                               | 28.2                              | 30                                |

| Protein/ Ligand                     | PurC + Fragment 2                 | PurC + Compound 9                 | PurC + Compound 13               |
|-------------------------------------|-----------------------------------|-----------------------------------|----------------------------------|
| <b>PDB Code</b>                     | <b>6Z0Q</b>                       | <b>6YY6</b>                       | <b>6YY8</b>                      |
| <b>Resolution range (Å)</b>         | 45.88 - 1.535 (1.59 - 1.535)      | 39.37 - 1.499 (1.553 - 1.499)     | 37.05 - 1.3 (1.346 - 1.3)        |
| <b>Space group</b>                  | P 1 2 1 1                         | P 1 2 1 1                         | P 1 2 1 1                        |
| <b>Unit cell</b>                    | 48.247 65.201 49.051 90 110.73 90 | 47.582 64.368 48.037 90 110.85 90 | 47.787 64.771 48.311 90 110.8 90 |
| <b>Total reflections</b>            | 78438 (7777)                      | 83504 (8585)                      | 134072 (12981)                   |
| <b>Unique reflections</b>           | 41356 (4073)                      | 41921 (4308)                      | 67485 (6620)                     |
| <b>Multiplicity</b>                 | 1.9 (1.9)                         | 2.0 (2.0)                         | 2.0 (2.0)                        |
| <b>Completeness (%)</b>             | 97.34 (96.36)                     | 96.47 (99.93)                     | 99.76 (98.50)                    |
| <b>Mean I/sigma(I)</b>              | 13.86 (2.11)                      | 18.59 (4.26)                      | 21.17 (3.56)                     |
| <b>Wilson B-factor</b>              | 18.56                             | 15.62                             | 13.63                            |
| <b>R-merge</b>                      | 0.03273 (0.3815)                  | 0.01857 (0.1375)                  | 0.01674 (0.1699)                 |
| <b>R-meas</b>                       | 0.04628                           | 0.02627                           | 0.02367                          |
| <b>CC1/2</b>                        | 0.998 (0.769)                     | 0.999 (0.963)                     | 0.999 (0.94)                     |
| <b>CC*</b>                          | 0.999 (0.932)                     | 1 (0.99)                          | 1 (0.984)                        |
| <b>R-work</b>                       | 0.1869 (0.2461)                   | 0.1768 (0.2268)                   | 0.1530 (0.1979)                  |
| <b>R-free</b>                       | 0.2310 (0.2660)                   | 0.2034 (0.2462)                   | 0.1802 (0.2191)                  |
| <b>Number of non-hydrogen atoms</b> | 2592                              | 2618                              | 2661                             |
| <b>macromolecules</b>               | 2272                              | 2275                              | 2283                             |
| <b>ligands</b>                      | 21                                | 30                                | 40                               |
| <b>water</b>                        | 299                               | 313                               | 338                              |
| <b>Protein residues</b>             | 295                               | 295                               | 295                              |
| <b>RMS(bonds)</b>                   | 0.008                             | 0.006                             | 0.006                            |
| <b>RMS(angles)</b>                  | 1.02                              | 1.02                              | 1.04                             |
| <b>Ramachandran favored (%)</b>     | 99                                | 99                                | 99                               |
| <b>Ramachandran outliers (%)</b>    | 0                                 | 0                                 | 0                                |
| <b>Clashscore</b>                   | 1.34                              | 2                                 | 0.88                             |
| <b>Average B-factor</b>             | 23                                | 20.8                              | 18.6                             |
| <b>macromolecules</b>               | 21.8                              | 19.4                              | 16.7                             |
| <b>ligands</b>                      | 35.4                              | 27.1                              | 31                               |
| <b>solvent</b>                      | 31.4                              | 30.8                              | 30.4                             |

| Protein/ Ligand              | PurC + Compound 14                | PurC + Compound 16                | PurC + Compound 19                |
|------------------------------|-----------------------------------|-----------------------------------|-----------------------------------|
| PDB Code                     | 6YY7                              | 6YY9                              | 6YYA                              |
| Resolution range (Å)         | 44.92 - 1.347 (1.395 - 1.347)     | 44.73 - 1.413 (1.463 - 1.413)     | 39.54 - 1.409 (1.459 - 1.409)     |
| Space group                  | P 1 21 1                          | P 1 21 1                          | P 1 21 1                          |
| Unit cell                    | 47.682 64.753 48.013 90 110.68 90 | 47.792 64.761 48.069 90 110.64 90 | 47.801 64.956 48.277 90 110.81 90 |
| Total reflections            | 120492 (12020)                    | 104026 (9742)                     | 104979 (9597)                     |
| Unique reflections           | 60403 (6036)                      | 52437 (5139)                      | 53031 (5035)                      |
| Multiplicity                 | 2.0 (2.0)                         | 2.0 (1.9)                         | 2.0 (1.9)                         |
| Completeness (%)             | 99.94 (99.95)                     | 99.82 (98.52)                     | 99.38 (94.77)                     |
| Mean I/sigma(I)              | 16.07 (2.33)                      | 24.11 (7.35)                      | 17.64 (5.35)                      |
| Wilson B-factor              | 15.25                             | 14.92                             | 16.09                             |
| R-merge                      | 0.02152 (0.2639)                  | 0.01616 (0.1131)                  | 0.02298 (0.1348)                  |
| R-meas                       | 0.03044                           | 0.02286                           | 0.03249                           |
| CC1/2                        | 0.999 (0.878)                     | 0.997 (0.919)                     | 0.998 (0.959)                     |
| CC*                          | 1 (0.967)                         | 0.999 (0.979)                     | 1 (0.99)                          |
| R-work                       | 0.1580 (0.2293)                   | 0.1680 (0.2021)                   | 0.1864 (0.2355)                   |
| R-free                       | 0.1856 (0.2728)                   | 0.1900 (0.2529)                   | 0.2152 (0.2508)                   |
| Number of non-hydrogen atoms | 2647                              | 2603                              | 2566                              |
| macromolecules               | 2292                              | 2278                              | 2272                              |
| ligands                      | 38                                | 35                                | 44                                |
| water                        | 317                               | 290                               | 250                               |
| Protein residues             | 295                               | 295                               | 294                               |
| RMS(bonds)                   | 0.006                             | 0.006                             | 0.007                             |
| RMS(angles)                  | 1.01                              | 1.03                              | 1.09                              |
| Ramachandran favored (%)     | 98                                | 99                                | 98                                |
| Ramachandran outliers (%)    | 0                                 | 0                                 | 0                                 |
| Clashscore                   | 2.19                              | 1.99                              | 1.1                               |
| Average B-factor             | 20.9                              | 19.9                              | 21.6                              |
| macromolecules               | 19.3                              | 18.6                              | 20.7                              |
| ligands                      | 27.4                              | 24.7                              | 22.3                              |
| solvent                      | 31.4                              | 29.4                              | 30.3                              |

| Protein/ Ligand              | PurC + Compound 24               | PurC + Compound 27                | PurC + Compound 28                |
|------------------------------|----------------------------------|-----------------------------------|-----------------------------------|
| PDB Code                     | 6YYB                             | 6YYD                              | 6YYC                              |
| Resolution range (Å)         | 44.94 - 1.508 (1.562 - 1.508)    | 45.21 - 1.387 (1.437 - 1.387)     | 44.48 - 1.274 (1.319 - 1.274)     |
| Space group                  | P 1 21 1                         | P 1 21 1                          | P 1 21 1                          |
| Unit cell                    | 47.68 64.087 47.972 90 110.49 90 | 47.708 64.471 48.372 90 110.82 90 | 47.596 64.174 48.262 90 110.85 90 |
| Total reflections            | 83357 (8055)                     | 107031 (10496)                    | 133393 (10681)                    |
| Unique reflections           | 41939 (4050)                     | 53901 (5303)                      | 67061 (5381)                      |
| Multiplicity                 | 2.0 (2.0)                        | 2.0 (2.0)                         | 2.0 (2.0)                         |
| Completeness (%)             | 98.31 (95.56)                    | 97.31 (96.28)                     | 94.67 (76.23)                     |
| Mean I/sigma(I)              | 9.17 (2.12)                      | 7.30 (0.87)                       | 5.55 (0.68)                       |
| Wilson B-factor              | 13.38                            | 15.87                             | 14.25                             |
| R-merge                      | 0.0544 (0.3673)                  | 0.04541 (0.8003)                  | 0.05419 (0.7874)                  |
| R-meas                       | 0.07694                          | 0.06422                           | 0.07664                           |
| CC1/2                        | 0.99 (0.793)                     | 0.998 (0.458)                     | 0.997 (0.692)                     |
| CC*                          | 0.997 (0.94)                     | 0.999 (0.793)                     | 0.999 (0.904)                     |
| R-work                       | 0.2193 (0.2673)                  | 0.1988 (0.3347)                   | 0.2222 (0.4070)                   |
| R-free                       | 0.2492 (0.3075)                  | 0.2228 (0.3559)                   | 0.2556 (0.3966)                   |
| Number of non-hydrogen atoms | 2524                             | 2609                              | 2608                              |
| macromolecules               | 2266                             | 2276                              | 2288                              |
| ligands                      | 27                               | 32                                | 30                                |
| water                        | 231                              | 301                               | 290                               |
| Protein residues             | 294                              | 295                               | 295                               |
| RMS(bonds)                   | 0.006                            | 0.006                             | 0.006                             |
| RMS(angles)                  | 1                                | 1                                 | 1.03                              |
| Ramachandran favored (%)     | 99                               | 98                                | 99                                |
| Ramachandran outliers (%)    | 0.34                             | 0                                 | 0                                 |
| Clashscore                   | 2                                | 1.55                              | 1.1                               |
| Average B-factor             | 17.2                             | 20.4                              | 19.3                              |
| macromolecules               | 16.5                             | 19.2                              | 18.3                              |
| ligands                      | 15.8                             | 20.6                              | 19.1                              |
| solvent                      | 24.8                             | 29.3                              | 27                                |

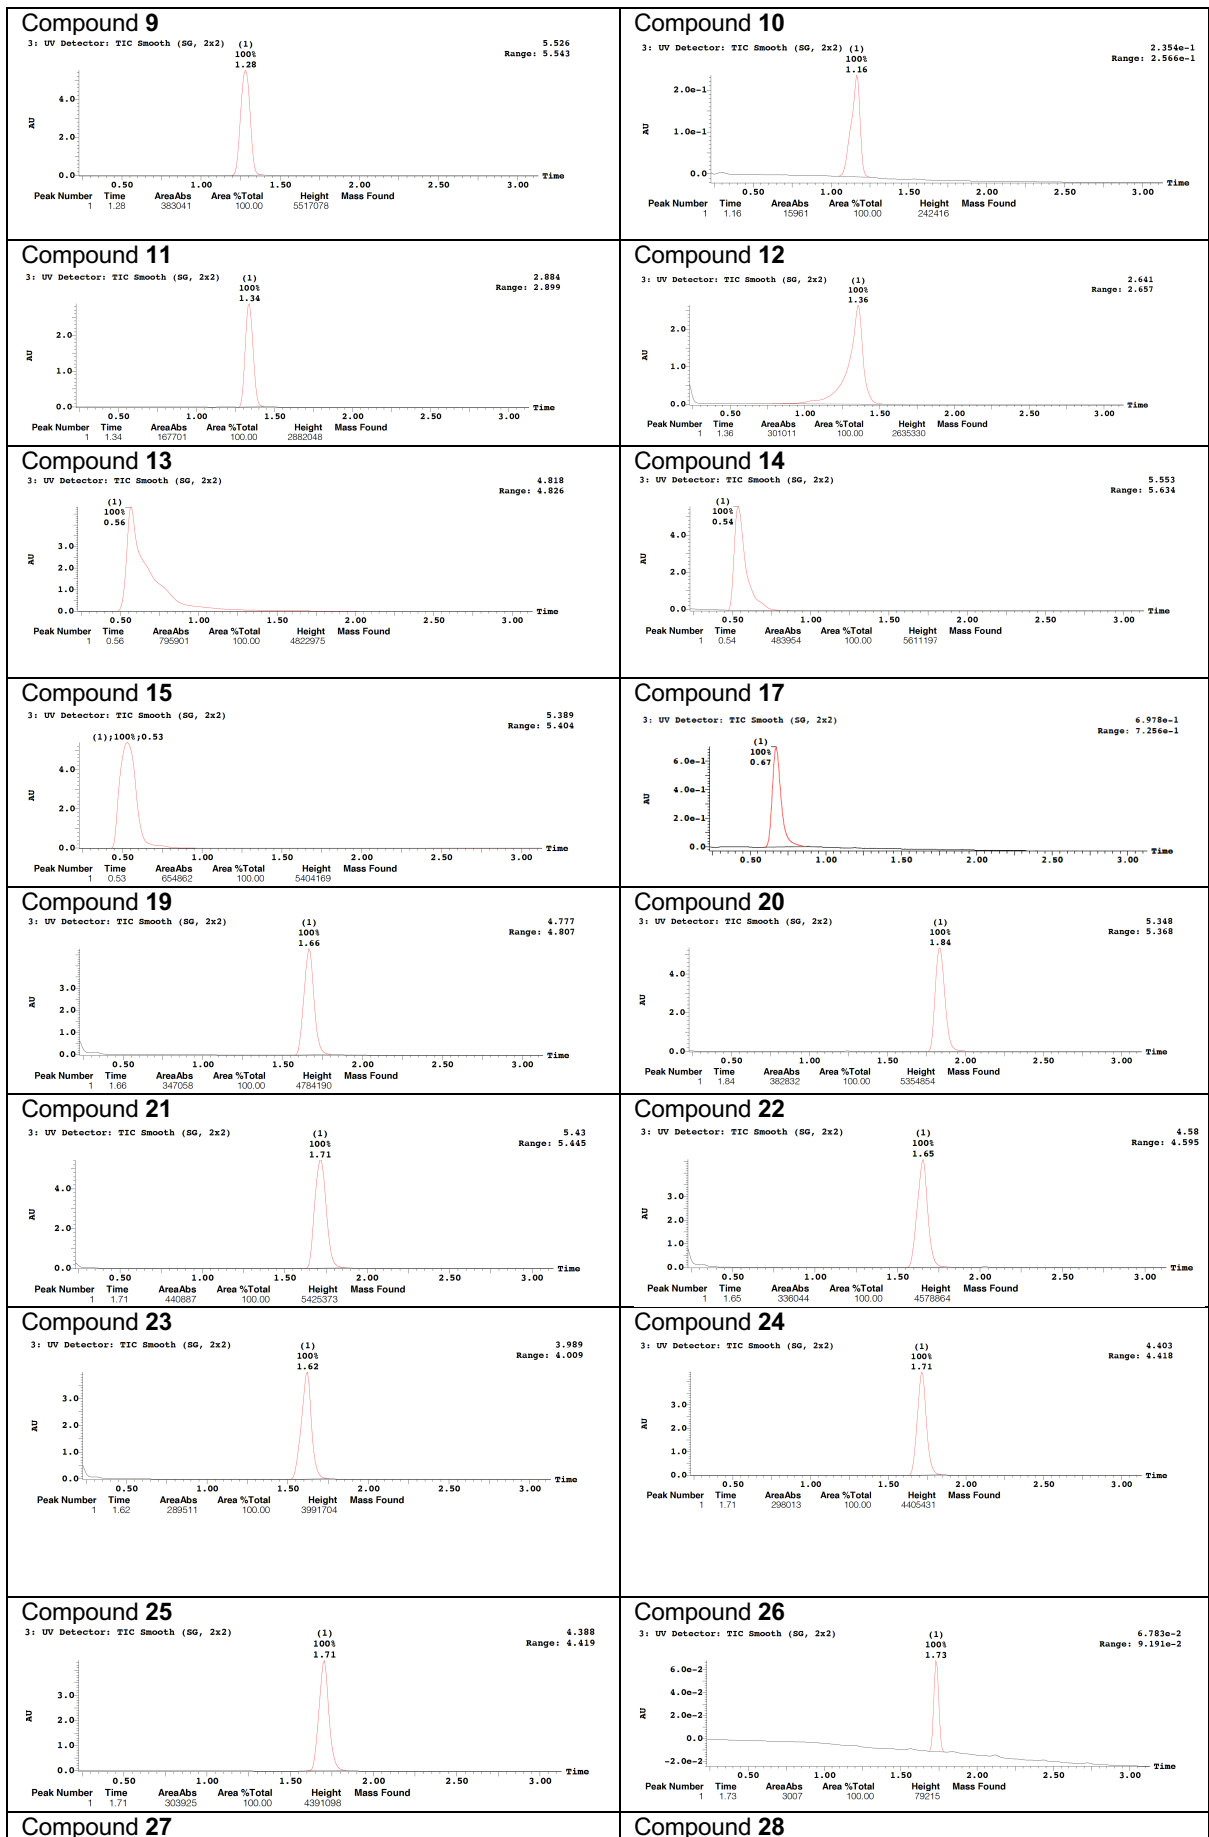

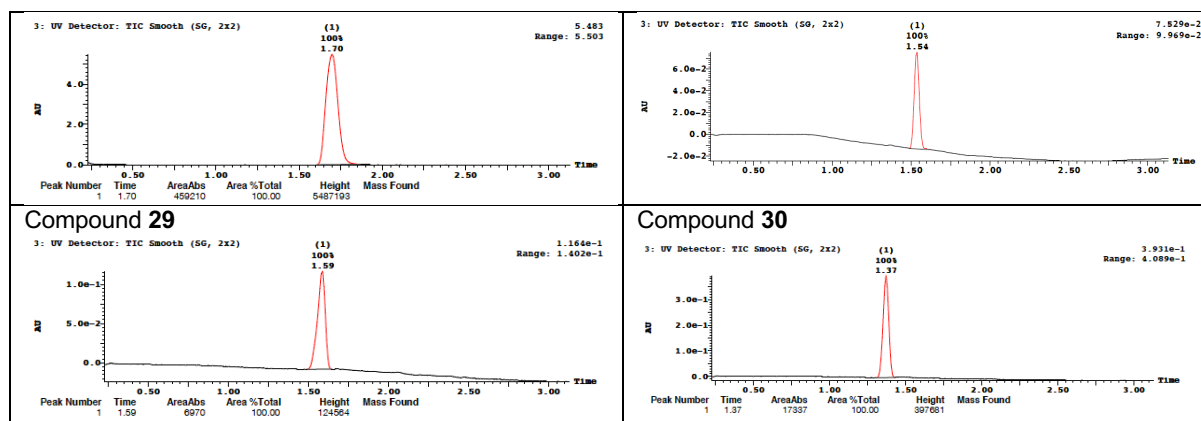

**Figure S9:** Selected LMCS chromatograms of screened compounds

## References

- Williamson, D. S., Smith, G. P., Acheson-Dossang, P., Bedford, S. T., Chell, V., Chen, I. J., Daechsel, J. C. A., Daniels, Z., David, L., Dokurno, P., Hentzer, M., Herzig, M. C., Hubbard, R. E., Moore, J. D., Murray, J. B., Newland, S., Ray, S. C., Shaw, T., Surgenor, A. E., Terry, L., Thirstrup, K., Wang, Y., Christensen, K. V. (2017) *J Med Chem.*, 60 (21), 8945-8962.
- Boger, D.L., Otrubova, K., Cisar, J.S., Grice, C.A., Jones, T.K. Patent No. WO/2015/179559
- Katz, J. D., Jewell, J. P., Guerin, D. J., Lim, J., Dinsmore, C. J., Deshmukh, S. V., Pan, B-S, Marshall, C. G., Lu, W. Altman, M. D., Dahlberg, W. K., Davis, L., Falcone, D., Gabarda, A. E., Hang, G., Hatch, H., Holmes, R., Kunii, K., Lumb, K. J., Lutterbach, B., Mathvink, R., Nazef, N., Patel, S. B., Qu, X., Reilly, J. F., Rickert, K. W., Rosenstein, C., Soisson, S. M., Spencer, K. B., Szewczak, A. A., Walker, D., Wang, W., Young, J., Zeng, Q., (2011) *J Med Chem*, **54** (12), 4092-4108.
- Westaway, S. M., Preston, A. G. S., Barker, M. D., Brown, F., Brown, J. A., Campbell, M., Chung, C.-W., Drewes, G., Eagle, R., Garton, N., Gordon, L., Haslam, C., Hayhow, T. G. Humphreys, P. G., Joberty, G., Katso, R., Kruidenier, L., Leveridge, M., Pemberton, M., Rioja, I., Seal, G. A., Shipley, T., Singh, O., Suckling, C. J., Taylor, J., Thomas, P., Wilson, D. M., Lee, K., Prinjha, R. K., (2016) *J Med Chem.*, 59 (4), 1370-1387.
- Trabanco, A. A., Tresadern G., Macdonald G. J., Vega, J. A., de Lucas, A. I., Matesanz E., García, A., Linares, M. L., Alonso de Diego, S. A., Alonso, J. M., Oehlich, D., Ahnaou, A. , Drinkenburg, W., Mackie, C., Andrés, J. I., Lavreysen H., Cid, J. M. (2012) *J Med Chem.*, 55 (6), 2688-2701.
- Thomas, S. E., Collins, P., James, R. H., Mendes, V., Charoensuththivarakul, S., Radoux, C., Abell, C., Coyne, A. G., Floto, R. A., von Delft, F., Blundell, T. L., (2019) *Philos Trans A Math Phys Eng Sci.*, 377 (2147), 20180422.
